# Supplementary material for: A prognostic pollen emissions model for climate models(PECM1.0)
Source: Copernicus journal article supplement (doi:10.5194/gmd-2017-105), 2017-06-16
Supplement: Supplementary file [file gmd-2017-105-AC1-supplement.pdf]

# Response to Referee #1

Thank you for your compliments and constructive suggestions to improve the manuscript. Referee #1's comments are individually listed below with a corresponding author response. Line numbers in author responses correspond to the revised manuscript.

**Comment:** General: Throughout the manuscript the word “climatological” or “climatology” is used instead of the word “average” or “mean” with regard to pollen. For example, lines 161- 162 state that: “For deciduous broadleaf forest (DBF) taxa, the Southeast has the highest climatological pollen maximum reaching up to about 700-1200 grains m<sup>-3</sup> around day 100.” This is confusing because it is applied to a non climatic/meteorological variable, and because it is used in a manuscript which also focusses on climate. It would be much better to simply state: “For deciduous broadleaf forest (DBF) taxa, the Southeast has the highest average pollen maximum reaching up to about 700-1200 grains m<sup>-3</sup> around day 100.”

Similarly, lines 159-160 could be modified from: “Figure 2 shows the observed climatological PFT daily pollen counts averaged over all stations within the defined subregions.” to: “Figure 2 shows the observed average daily PFT pollen counts averaged over all stations within the defined subregions.”.

And so on.

**Response:** All instances of “climatological” or “climatology” with regards to pollen emission fluxes and counts have been changed to “average”, sometimes with added specificity (e.g, “8-year average pollen time series”, Line 164).

**Comment:** Line 17, Abstract: “PFT” is used without being given in full earlier in the Abstract, so please provide both the full and abbreviated form here.

**Response:** PFT defined as “plant functional type” at first use in the in abstract (Line 17).

**Comment:** Line 40, Introduction: The authors may wish to refer to two recently published works that relate to the introductory material here and/or elsewhere in the Introduction:

Sofiev M, Prank M. Impacts of climate change on aeroallergen dispersion, transport, and deposition. In: Beggs PJ (Editor). Impacts of Climate Change on Allergens and Allergic Diseases. Cambridge University Press, Cambridge, 2016. pp 50-73.

Beggs PJ, Šikoparija B, Smith M. Aerobiology in the International Journal of Biometeorology, 1957–2017. International Journal of Biometeorology 2017. DOI: 10.1007/s00484-017-1374-5 [see section on “Aerobiological modelling and forecasting”]

**Response:** Beggs et al. 2017 is now cited on a new line that reads, “The interest and growing wealth of knowledge of allergenic pollen is reviewed by *Beggs et al.* (2017).” (Lines 40-41).

Sofiev & Prank 2016 was found useful for the discussion of climate-scale pollen dispersion models, thus it cited in a new line of the introduction, “Only recently have regional-scale modeling studies of pollen dispersion been conducted for Europe, and they have been used to assess the impacts of climate change on airborne pollen distributions.” (Lines 45-47).

**Comment:** Line 98: This sentence makes reference to “the Finnish emergency modeling system (SILAM)”. It would be better to change this to “the Finnish System for Integrated modelLing of Atmospheric coMposition (SILAM)” as given in the Introduction section of Sofiev et al. (2013).

**Response:** This correction to the acronym “SILAM” has been made on Lines 110-111.

**Comment:** Line 130, paragraph 1 of section 2.1: Table 1 does not relate to “NAB pollen count data ranging from 2003-2010 at all stations in the continental United States”, so delete reference to it and just refer to Figure 1.

**Response:** The reference to Table 1 was intended to be a reference to Table S1; Table S1 is now referenced at the end of paragraph 1 of section 2.1, and any reference to Table 1 has been deleted.

**Comment:** Line 139: This line includes a reference to Table 2. There is no Table 2 in the manuscript. Should it be Table S2?

**Response:** The reference to Table 2 was intended to be toward Table S2. It has been corrected on Line 152.

**Comment:** Line 140: Change “Cupresseceae” to “Cupressaceae”.

**Response:** This spelling correction was made on Line 150.

**Comment:** Lines 155-159, paragraph 1 of section 2.2: Currently just two of the four boundaries of each of the five subregions are provided. Please provide upper and lower limits of both latitude and longitude for each subregion.

**Response:** We have revised the subregion boundaries to include full boundaries as displayed in Figure 1. (Lines 167-173).

**Comment:** Lines 161-170: The paragraph in these lines seems to contain several values that do not match what is shown in Figure 2. Specifically, deciduous broadleaf forest (DBF) taxa in the Southeast does not have an average pollen maximum reaching up to about 700-1200 grains m<sup>-3</sup>. Figure 2b shows that it only reaches up to about 500 grains m<sup>-3</sup>. In the Northeast, DBF does not reach up to an average of 400 grains m<sup>-3</sup>. It peaks just above 240 grains m<sup>-3</sup>. And finally, a sharp maximum of 775 grains m<sup>-3</sup> does not appear in the Mountain subregion. The sharp maximum is only about 360 grains m<sup>-3</sup>. The paragraph should be carefully checked.

Line 173: As above, please check the numbers 400 and 200 in this line.

**Response:** We thank the reviewer for drawing this to our attention. Figure 2 data was found to have errors, and as a result does not match the text as noted by the reviewer. We have revised Figure 2 with the correct data and now the figure is consistent with the manuscript text.

**Comment:** Lines 184-186: The discussion regarding C<sub>3</sub> and C<sub>4</sub> grasses here and/or elsewhere in the manuscript may be enhanced through reference to the following article:  
Medek DE, Beggs PJ, Erbas B, Jaggard AK, Campbell BC, Vicendese D, Johnston FH, Godwin I, Huete AR, Green BJ, Burton PK, Bowman DMJS, Newnham RM, Kate-laris CH, Haberle SG, Newbiggin E, Davies JM. Regional and seasonal variation in airborne grass pollen levels between cities of Australia and New Zealand. *Aerobiologia* 2016;32(2):289-302. DOI: 10.1007/s10453-015-9399-x

**Response:** Thank you for the suggestion. Medek et al. 2016 has been cited in the main discussion of C<sub>3</sub> and C<sub>4</sub> grass phenology in Section 2.2. New lines of text are as follows: “Similarly, *Medek et al.* (2016) observed two grass pollen peaks in Australia, with a stronger, late-summer peak at lower Southern latitudes where there is higher incidence of C<sub>4</sub> grass. However, the authors note that sometimes this may be due to a second flowering of some C<sub>3</sub> grass species.” (Lines 211-213). This paper was also used in the discussion of phenological trends in Section 4.2 with new text as follow: “Trends for grass in Australasia show that the correlation of the end date of the pollen season with average spring temperature is positive, while the same relationship for the start date is negative, suggesting also that season start dates are earlier and season duration increases with warmer climates (Medek et al. 2016).” (Lines 408-410).

**Comment:** Line 278: Change “met” to “meteorological”.

**Response:** Correction made from “met” to “meteorological”. (Line 339).

**Comment:** Line 343: With respect to the Parry et al. 2007 citation, it should be Confalonieri et al. 2007 because the former are the book editors and the latter are the chapter authors. Change also in the References list (i.e., chapter authors first, book editors later in the reference). Further, here and/or elsewhere in this paragraph (lines 342-352) could benefit from reference to the following:

Ziska LH. Impacts of climate change on allergen seasonality. In: Beggs PJ (Editor). Impacts of Climate Change on Allergens and Allergic Diseases. Cambridge University Press, Cambridge, 2016. pp 92-112.  
Ziska L, Knowlton K, Rogers C, Dalan D, Tierney N, Elder MA, Filley W, Shropshire J, Ford LB, Hedberg C, Fleetwood P, Hovanky KT, Kavanaugh T, Fulford G, Vrtis RF, Patz JA, Portnoy J, Coates F, Bielory L, Frenz D. Recent warming by latitude associated with increased length of ragweed pollen season in central North America. Proceedings of the National Academy of Sciences of the United States of America 2011;108(10):4248–4251. DOI: 10.1073/pnas.1014107108

**Response:** The reference to Parry et al. 2007 has been changed to Confalonieri et al. 2007 as suggested. The additional references are excellent examples of general and advanced discussions on pollen phenology. Ziska 2016 is cited several times throughout the manuscript : “The spatiotemporal heterogeneity of climate change may affect which regions and seasons will be most influenced by climate change (Ziska 2016).” (Line 415-416), with a second citation on Line 419-420 and a third citation in the introduction: “Climatic changes in large-scale pollen distributions are mostly absent from scientific literature, though multiple studies on phenological changes in the pollen season have been published” (Lines 43-44). Ziska et al. 2011 has been cited in the discussion of ragweed phenology in Section 4.2: “The apparent trend in the season end date for *Ambrosia* with PYAAT could be due to the increased number of frost-free days, consistent with global warming, and a strong relationship between frost-free days and changes of ragweed season length” (Lines 410-413).

**Comment:** Line 359: This line includes a reference to Table 2. There is no Table 2 in the manuscript. Should the reference be to Table 1?

**Response:** We apologize for this mistake. The table reference in section 4.3 should be to Table 1. This has been corrected.

**Comment:** Lines 505-507, section 5.2.4: This sentence, and this section, seems to neglect any mention that the first of the two observed ragweed peaks in the Mountain subregion (from about day 100 to day 140) is entirely missed by the model.

**Response:** We have added a note about the spring ragweed peak in the Mountain subregion in the discussion (“There is a yet unidentified observed spring peak of ragweed pollen at about day 125 in the Mountain subregion, possibly due to an identification error.” lines 641-642), though no known source can yet be identified for these somewhat unusual ragweed pollen counts.

**Comment:** Note also that the lower row of plots in Figure 12 is mislabelled (except for the first in the row). What are currently r-u should really be q-t. q was missed somehow.

**Response:** Thank you for pointing out this error. Figure 12 has been updated with corrected panel labels, now including q and excluding u.

**Comment:** Line 532: See earlier comment regarding Parry et al. 2007. Also, a couple of additional references that would be strong support for this sentence are:

Lake IR, Jones NR, Agnew M, Goodess CM, Giorgi F, Hamaoui-Laguel L, Semenov MA, Solomon F, Storkey J, Vautard R, Epstein MM. Climate change and future pollen allergy in Europe. Environmental Health Perspectives 2017;125(3):385–391. DOI: 10.1289/EHP173

Ziello C, Sparks TH, Estrella N, Belmonte J, Bergmann KC, Bucher E, et al. Changes to airborne pollen counts across Europe. PLoS One 2012;7(4):e34076. DOI: 10.1371/journal.pone.0034076

**Response:** Additional references Ziello et al. 2012 and Lake et al. 2017 have been added to the citation in Line 664 as they support this discussion point. In addition, Lake et al. 2017 was cited in Lines 45-47 in the discussion of recent pollen dispersion modeling efforts.

**Comments:** Line 570: Change “estimating” to “estimation”.

**Response:** Change made on Line 703.

**Comment:** Line 584: Change “Association for” to “Academy of”.

**Response:** Change made on Line 718.

**Comment:** References: These should be carefully checked to ensure the details and format are correct. Details should be carefully checked against the PDF of each article.

**Response:** All references have been checked against their articles, and the details have been corrected for any references that were missing components or incorrectly formatted.

**Comment:** Line 731, Figure 1 caption: Instead of using the word “black” to describe the shading of the Pacific Northwest subregion, perhaps the term “dark grey” would be better.

**Response:** “black” updated to “dark grey” in Figure 1 caption as suggested.

**Comment:** Figure 2: The RAG and GRA lines are too similar. They are fine when enlarged on screen but when printed they are difficult to tell apart. Perhaps one could be red and the other black (meaning the four lines would be black, red, green, and blue).

**Response:** The line colors in Figure 2 have been updated such that the previously red ragweed line is now magenta. This appears to provide good contrast for all lines in this plot.

**Comment:** Line 733, Figure 2 caption: As stated earlier in the comments with respect to the manuscript as a whole, remove the word “climatological” and replace it with “average”, such as: Average daily observed time series of pollen count data . . .

**Response:** This language has been updated from “climatological” to “average”.

**Comment:** Line 740, Figure 3 caption: BELD is defined as “Biogenic Emissions Landuse Database” in Section 3.1 paragraph 2, not “Biogenic Emissions Land cover Database” as it is here in the figure caption. Which is correct?

**Response:** We apologize for this confusion. The correct name is “Biogenic Emissions Landuse Database”. The Figure 3 caption has been updated to reflect this.

**Comment:** Line 748, Figure 4 caption: Indicate that ragweed is “(g)”.

**Response:** Figure 4 caption has been updated accordingly.

**Comment:** Line 757, Figure 6 caption: Change the start of the caption to: Monthly average pollen emissions potential . . .

**Response:** This correction has been made to the Figure 6 caption.

**Comment:** Lines 777-782, Figure 12 caption: Change the three occurrences of climatological/climatology. The caption can start: Average daily (2003-2010) time series of pollen counts . . .

**Response:** The Figure 12 caption has been updated accordingly.

**Comment:** Line 778: Change RAG from “p-u” to “p-t”.

**Response:** The Figure 12 caption has been updated to reflect the changes to the panel labels in the figure.

**Comment:** Line 782: Add to the end of the very last sentence “by region and PFT”, i.e.: Note: scale of y-axes varies by region and PFT.

**Response:** This addition has been made to the Figure 12 caption.

**Comment:** Table 1: The numbers in the production factor (P) column should include the same number of numbers after the decimal point (I suggest 1, e.g., 89.1, 210.0, etc.), and the numbers should be aligned right in the column, not aligned left.

**Response:** All values right aligned. Decimal places are left unchanged for production factors as those are formatted to reflect the correct number of significant digits in that data. Linear regression values are also updated so that all numbers are rounded to two decimal places.

Best,

Matthew Wozniak

1 **A prognostic pollen emissions model for climate models**  
2 **(PECM1.0)**

3 Matthew C. Wozniak<sup>1</sup>, Allison L. Steiner<sup>1</sup>

4 <sup>1</sup>Climate and Space Sciences and Engineering, University of Michigan, Ann Arbor, MI 48109, USA

5 *Correspondence to:* Matthew C. Wozniak (mcwoz@umich.edu)

6 **Abstract.** We develop a prognostic model of Pollen Emissions for Climate Models (PECM) for use within regional  
7 and global climate models to simulate pollen counts over the seasonal cycle based on geography, vegetation type  
8 and meteorological parameters. Using modern surface pollen count data, empirical relationships between prior-year  
9 annual average temperature and pollen season start dates and end dates are developed for deciduous broadleaf trees  
10 (*Acer*, *Alnus*, *Betula*, *Fraxinus*, *Morus*, *Platanus*, *Populus*, *Quercus*, *Ulmus*), evergreen needleleaf trees  
11 (Cupressaceae, Pinaceae), grasses (Poaceae; C<sub>3</sub>, C<sub>4</sub>), and ragweed (*Ambrosia*). This regression model explains as  
12 much as 57% of the variance in pollen phenological dates, and it is used to create a “climate-flexible” phenology  
13 that can be used to study the response of wind-driven pollen emissions to climate change. The emissions model is  
14 evaluated in a regional climate model (RegCM4) over the continental United States by prescribing an emission  
15 potential from PECM and transporting pollen as aerosol tracers. We evaluate two different pollen emissions  
16 scenarios in the model, using: (1) a taxa-specific land cover database, phenology and emission potential, and (2) a  
17 [plant functional type \(PFT\)](#), land cover, phenology and emission potential. The simulated surface pollen  
18 concentrations for both simulations are evaluated against observed surface pollen counts in five climatic subregions.  
19 Given prescribed pollen emissions, the RegCM4 simulates observed concentrations within an order of magnitude,  
20 although the performance of the simulations in any subregion is strongly related to the land cover representation and  
21 the number of observation sites used to create the empirical phenological relationship. The taxa-based model  
22 provides a better representation of the phenology of tree-based pollen counts than the PFT-based model, however we  
23 note that the PFT-based version provides a useful and “climate-flexible” emissions model for the general  
24 representation of the pollen phenology over the United States.

25

Matthew Wozniak 8/2/2017 5:14 PM

Deleted: PFT

Matthew Wozniak 8/2/2017 5:14 PM

Deleted: -

28 **1 Introduction**

29 Pollen grains are released from plants to transmit the male genetic material for reproduction. When lofted into the  
30 atmosphere, they represent a natural source of coarse atmospheric aerosols, ranging typically from 15 to 60 µm in  
31 diameter, while sometimes exceeding 100 µm (Cecchi 2014; Sofiev et al. 2014). In the mid-latitudes, much of the  
32 vegetation relies dominantly on anemophilous, or wind-driven, pollination (Lewis et al. 1983), representing a  
33 closely coupled relationship of pollen emissions to weather and climate. Anemophilous pollinators include woody  
34 plants such as trees and shrubs, as well as other non-woody vascular plants such as grasses and herbs. Pollen  
35 emissions are directly affected by meteorological (e.g., temperature, wind, relative humidity) and climatological  
36 (e.g., temperature, soil moisture) factors (Weber 2003). Aerobiology studies indicate that after release, pollen can be  
37 transported on the order of ten to a thousand kilometers (Sofiev et al. 2006; Schueler and Schlünzen 2006;  
38 Kuparinen et al. 2007) but there are still large uncertainties regarding emissions and transport of pollen.  
39 Prognostic pollen emissions are useful for the scientific community and public, specifically for forecasting  
40 allergenic conditions or predicting the flow of genetic material. The interest and growing wealth of knowledge of  
41 allergenic pollen has been recently reviewed by Beggs et al. (2017). To date, most pollen emissions models focus on  
42 relatively short, seasonal time scales and smaller locales for a limited selection of taxa (Sofiev et al. 2013; Liu et al.  
43 2016; R. Zhang et al. 2014). Climatic changes in large-scale pollen distributions are mostly absent from scientific  
44 literature, though multiple studies on phenological changes in the pollen season have been published (Ziska 2016;  
45 Yue et al. 2015; Y. Zhang et al. 2015a). Only recently have regional-scale modeling studies of pollen dispersion  
46 been conducted for Europe, and they have been used to assess the impacts of climate change on airborne pollen  
47 distributions (Sofiev and Prank 2016; Lake et al. 2017). In contrast to most meteorological pollen models, climate  
48 models require long-term (e.g., decadal to century scale) emissions at a range of resolutions covering continental  
49 regions up to the global scale. This distinction in both time and space requires a flexible model that can account for  
50 emissions without taxon-specific emission data (i.e. differentiation between genera or species) and can be used  
51 within aggregated vegetation descriptions, such as plant functional types (PFTs). Given recent interest in airborne  
52 biological particles and their role in climate (Despres et al. 2012; Myriokefalitakis et al. 2017), an emissions model  
53 that captures longer temporal scales and broader spatial scales is key to developing global inventories and  
54 understanding pollen's role in the climate system. Here we develop a model for use in the climate modeling  
55 community that can be used specifically to simulate pollen emissions on the decadal or centurial time scale for large  
56 regions using conventional climate or Earth system models.  
57 Existing pollen forecasting models are often classified as either process-based phenological models or observation-  
58 based models (Scheifinger et al. 2013). Process-based phenological models employ a parameterization of plant  
59 physiology and climatic conditions (e.g., relating the timing of flowering to a chilling period, photoperiod, or water  
60 availability). Pollen season phenology in an anemophilous species is inherently connected to its environment via  
61 relationships in the growing season dynamics (e.g. bud burst and temperature, (Fu et al. 2012)), and many models  
62 apply the same techniques to flowering as for bud burst (Chuine et al. 1999). This approach to phenology could be  
63 suited to climate models, given its flexibility for adaptive phenological events and regional-scale studies. Typically,  
64 these types of phenological models are taxa specific as well as regionally dependent, e.g., *Betula* in Europe or

Matthew Wozniak 8/25/2017 12:15 PM  
Deleted: from  
Matthew Wozniak 8/25/2017 12:16 PM  
Deleted: 10  
Matthew Wozniak 8/9/2017 9:33 PM  
Deleted: 70  
Matthew Wozniak 8/25/2017 12:33 PM  
Deleted: Mikhail

Matthew Wozniak 8/23/2017 11:24 AM  
Deleted: M.

Matthew Wozniak 8/8/2017 12:27 PM  
Deleted: Mikhail

71 ragweed in California (Sofiev et al. 2013; Siljamo et al. 2013; R. Zhang et al. 2014). These models are usually  
72 calibrated to local data only even though distinct geographic differences exist for pollen phenology. Thus, such  
73 models may not perform equally well in other locations. Though process-based models draw a connection between  
74 an atmospheric state variable, i.e. temperature, and pollen emissions, at least three parameters are required for  
75 optimization and they are susceptible to overfitting (Linkosalo et al. 2008). While some process-based models may  
76 be scaled up to larger regions while maintaining appreciable accuracy (García-Mozo et al. 2009), such models are  
77 generally not practical for implementation in larger-scale climate modeling with regional climate models (RCMs)  
78 and global climate models (GCMs) because sufficient land cover data is not available at the appropriate taxonomic  
79 level.

80 In contrast to process-based models, observation-based methods determine the phenology of vegetation with  
81 statistical-empirical approaches (e.g., relating the start of the pollen season with mean temperatures preceding the  
82 pollen event) and often rely on regression models or time series modeling (Scheifinger et al. 2013). Time series  
83 modeling utilizes observations to define the deterministic and stochastic variability of pollen count observations and  
84 is frequently used in aerobiological studies (Moseholm et al. 1987; Box et al. 1994). Regression models, either using  
85 a single or multiple explanatory variable(s), exploit past relationships to define the magnitude of emissions as well  
86 as timing variables such as the start date and duration of the pollen season (Emberlin et al. 1999; M. Smith and  
87 Emberlin 2005; Galán et al. 2008). Using local pollen count data, *Zhang et al. (2015b)* completed a regional  
88 phenological analysis using multiple linear regressions for pollen in Southern California for six taxa. *Olsson and*  
89 *Jönsson (2014)* show that empirical models based solely on spring temperature perform just as well as process-based  
90 models using the temperature forcing concept, and better than those including a chilling or dormancy-breaking  
91 requirement.

92 Observation-based methods assume stationarity, or the likelihood that the statistics of pollen counts or climate  
93 variables are not changing over time. For these models to apply outside of calibration period, they require that the  
94 driving pattern or relationship is maintained in the future (or past). For example, as the Earth's climate changes,  
95 these models do not represent the complex connections between pollen emissions and a warming world aside from  
96 the relationships determined empirically. However, these models provide clear and often simple formulations that  
97 have predictable behaviors and forgo the nuance of fitting ambiguous and uncertain parameters. We therefore  
98 choose to employ elements of the observational methods for this pollen emissions model formulation, as described  
99 in Section 4.

100 In addition to understanding the release of pollen grains, a second consideration is the large-scale transport of pollen.  
101 Once emitted to the atmosphere, pollen is mixed within the atmospheric boundary layer by turbulence, and  
102 depending on large-scale conditions, can be transported far from the emission source. Prior studies have used both  
103 Lagrangian (Hunt et al. 2002; Hidalgo et al. 2002) and Eulerian techniques to simulate the transport of pollen, with  
104 the former typically used for studies of crop germination and the latter primarily for allergen forecasting. For  
105 example, *Helbig et al. (2004)* used the meteorological model KAMM (Karlsruher Meteorologisches Modell) with  
106 the DRAIS (Dreidimensionales Ausbreitungs- und Immissions-Simulationsmodell) turbulence component to  
107 simulate daily pollen counts for region over Europe. *Schueler and Schlünzen (2006)* use a mesoscale atmospheric



108 model (METRAS) to quantify the release, transport and deposition of oak pollen for a two-day period over Europe.  
109 Sofiev *et al.* (2013) includes the long-range transport of birch pollen over Western Europe by developing a birch  
110 pollen map and a flowering model to trigger release in the [Finnish System for Integrated modeling of Atmospheric](#)  
111 [coMposition](#) (SILAM). *Efstathiou et al.* (2011) developed a pollen emissions model for use within the regional air  
112 quality model (the Community Multi-scale Air Quality model (CMAQ)), and tested their model with birch and  
113 ragweed taxa. *Zhang et al.* (2014) implements a similar pollen emissions scheme with a regional numerical weather  
114 prediction model (the Weather Research and Forecasting (WRF) modeling system). *Zink et al.* (2013) developed a  
115 generic pollen modeling parameterization for use with a numerical weather prediction model (COSMO-ART) that is  
116 flexible to include differing pollen taxa. Collectively, these relatively new developments suggest a growing interest  
117 in the prognostic estimation of pollen on the short-term for seasonal allergen forecasting on the weather (e.g., one to  
118 two weeks) time scale.

119 In this manuscript, we build on these coupled emissions-transport models and develop a comprehensive emissions  
120 model (Pollen Emissions for Climate Models; PECM) for use at climate model time scales that covers the majority  
121 of pollen sources in sub-tropical to temperate climates, including woody plants, grasses and ragweed. First, we  
122 summarize the spatial distribution and seasonality of pollen counts for various taxa in the United States based on  
123 current observations (Section 2). Then we develop new pollen emissions parameterization for climate studies  
124 (Section 4), transport these emissions over the continental United States (CONUS) using the Regional Climate  
125 Model version 4 (RegCM4) (Giorgi *et al.* 2012), and evaluate the results using eight years of observed pollen count  
126 data (Section 5). We implement two different land cover classification schemes to illustrate the uncertainties  
127 associated with vegetation representation for trees including: (1) detailed family- or genus- level tree distributions  
128 over CONUS, and (2) the use of plant functional type (PFT) level distributions, which groups vegetation types by  
129 physiological characteristics (Section 3). As the latter provides a greater opportunity for expansion into regional and  
130 global scale climate models over multiple domains, we discuss the effects that the PFT-based categorization has on  
131 the total estimated source strength of pollen. Finally, the limitations of this emissions framework and suggestions for  
132 future developments are included (Section 6).

## 133 2 Observed pollen Phenology

### 134 2.1 Data description

135 The National Allergy Bureau (NAB) of the American Academy of Allergy, Asthma and Immunology (AAAAI)  
136 conducts daily pollen counts at 96 sites in cities across the United States (US), its territories and several locations in  
137 southern Canada. All NAB sites implement a volumetric air sampler and certified pollen count experts to conduct  
138 daily pollen counts (grains m<sup>-3</sup>) for up to 42 plant taxa at either the family level (e.g., Cupressaceae, Poaceae), genus  
139 level (e.g., *Acer*, *Quercus*), or for four generic categories termed “Other Grass Pollen,” “Other Tree Pollen,” “Other  
140 Weed Pollen” or “Unidentified.” We use NAB pollen count data ranging from 2003-2010 at all stations in the  
141 continental United States (Figure 1) for selected taxa to develop and evaluate PECM, and to determine the  
142 phenology of wind-driven pollen. Individual station locations and descriptions are included in Table S1.

Matthew Wozniak 8/2/2017 5:43 PM

Deleted: Finnish emergency modeling system

Matthew Wozniak 8/2/2017 6:04 PM

Deleted: ; Table 1

146 We evaluate the observed pollen counts to determine the vegetation types that emit the largest magnitude of pollen  
147 over the continental United States. Since many of the taxa reported at the 96 NAB sites frequently have very low  
148 pollen counts (e.g., less than 10 grains m<sup>-3</sup>), a threshold for the grain count is set to select the taxa with the highest  
149 pollen counts. We calculate the average of the annual maximum pollen count across all years (2003-2010),  $P_{avgmax}$ ,  
150 at each site for each counted taxon. We then select taxa to include in PECM using two criteria: (1) the maximum of  
151  $P_{avgmax}$  among all stations exceeds 100 grains m<sup>-3</sup>, and (2) the average  $P_{avgmax}$  among all stations exceeds 70 grains m<sup>-3</sup>  
152 (Table S2). Using these two criteria, 13 taxa are selected for inclusion in the model, including *Acer*, *Alnus*,  
153 *Ambrosia*, *Betula*, Cupressaceae, *Fraxinus*, Poaceae, *Morus*, Pinaceae, *Platanus*, *Populus*, *Quercus* and *Ulmus*.

154 These thirteen taxa account for about 77% of the total pollen counted across the United States during 2003-2010.  
155 The 13 dominant pollen types are grouped into four main categories by plant functional type: deciduous broadleaf  
156 forest (DBF), evergreen needle-leaf forest (ENF), grasses (GRA) and ragweed (RAG). Plant functional type is a  
157 land cover classification commonly used in the land surface component of climate models, and this categorization  
158 will allow flexibility to apply the emissions model to other climate models. The DBF category includes 9 genus-  
159 level taxa (*Acer*, *Alnus*, *Betula*, *Fraxinus*, *Morus*, *Platanus*, *Populus*, *Quercus*, and *Ulmus*) and the ENF category  
160 includes two family-level taxa (Cupressaceae and Pinaceae). The grass PFT utilizes pollen count data from the  
161 Poaceae family, although we note that the grass PFT classification may include herbs and other non-woody species  
162 that may emit pollen as well. *Ambrosia* (ragweed) is segregated as its own category (RAG), due to its high pollen  
163 counts in the early autumn and unique land cover features. Daily pollen counts were summed for each PFT prior to  
164 calculating an 8-year average pollen time series.

## 166 2.2 Observed seasonality of pollen emissions

167 Pollen counts are analyzed over five subregions based on their climatic differences (Figure 1; Table S1) to identify  
168 emissions patterns over the continental United States. These five subregions are the Northeast (temperate; 38°-48°N  
169 and 70°-100°W; 34 stations), the Southeast (temperate, subtropical; 25°-38°N and 70°-100°W; 29 stations), Mountain  
170 (varied climate; 25°-48°N and 100°-116°W; 9 stations), California (Mediterranean, varied climate; 25°-40°N and  
171 116°-125°W; 13 stations) and the Pacific Northwest (temperate rainforest; west of 116°W and north of 40°N; 4  
172 stations). Figure 2 shows the observed average PFT daily pollen counts averaged over all stations within the defined  
173 subregions.

174 For deciduous broadleaf forest (DBF) taxa, the Southeast has the highest average pollen maximum reaching up to  
175 about 700-1200 grains m<sup>-3</sup> around day 100. In the Northeast, DBF is the dominant PFT, reaching up to an average  
176 of 400 grains m<sup>-3</sup> and peaking slightly later (around day 120) than the Southeast. California sites show an average  
177 peak around 150 grains m<sup>-3</sup> occurring slightly earlier around day 80. A sharp maximum of 775 grains m<sup>-3</sup> appears in  
178 the Mountain subregion at about day 80, with a secondary emission reaching around 150 grains m<sup>-3</sup> on day 125. In  
179 the Northwest, DBF pollen has the earliest maximum (day 70) at about the same magnitude as California (~200  
180 grains m<sup>-3</sup>). In some locations, there is a secondary DBF peak in the late summer and early fall due to the late  
181 flowering of *Ulmus crassifolia* and *Ulmus parvifolia*, located predominantly in the Southeast and California (Lewis,

Matthew Wozniak 8/2/2017 6:07 PM

Deleted: e

Matthew Wozniak 8/2/2017 5:14 PM

Deleted: a climatological

Matthew Wozniak 8/9/2017 11:06 AM

Deleted: ; Figure 1

Matthew Wozniak 8/9/2017 10:55 AM

Deleted: include

Matthew Wozniak 8/9/2017 10:54 AM

Deleted: north of

Matthew Wozniak 8/9/2017 10:54 AM

Deleted: east of

Matthew Wozniak 8/9/2017 10:55 AM

Deleted: south of

Matthew Wozniak 8/9/2017 10:56 AM

Deleted: east of

Matthew Wozniak 8/9/2017 10:56 AM

Deleted: and

Matthew Wozniak 8/9/2017 10:57 AM

Deleted: west of

Matthew Wozniak 8/9/2017 10:57 AM

Deleted: and south of 40°N

Matthew Wozniak 8/2/2017 5:17 PM

Deleted: climatological

Matthew Wozniak 8/2/2017 5:17 PM

Deleted: climatological

Matthew Wozniak 8/2/2017 5:18 PM

Deleted: climatological maximum

196 et al.1983). In the Southeast this occurs between days 225 and 300, while in California this occurs twice around day  
197 245 and day 265.

198 The two ENF families exhibit pollen release at two distinct but overlapping times, with Cupressaceae peaking before  
199 Pinaceae. Cupressaceae in the Southeast emits pollen earlier than in other subregions, with a maxima at just over  
200 400 grains m<sup>-3</sup> around day 10 and counts above 200 grains m<sup>-3</sup> in December of the prior year. Cupressaceae  
201 dominates the total emissions for the Southeast, with a smaller maximum from Pinaceae of about 180 grains m<sup>-3</sup>  
202 near day 110. In the Northeast, the bimodality of ENF is evident with the Cupressaceae family reaching a  
203 maximum of 100 grains m<sup>-3</sup> near day 85 with a secondary Pinaceae maximum approximately 65 days later at about  
204 half the magnitude (~50 grains m<sup>-3</sup>). In the Mountain and Pacific Northwest subregions, the maximum occurs around  
205 day 50-80 and can reach up to 350 grains m<sup>-3</sup> in the Mountain subregion, but in both subregions is generally much  
206 lower than the eastern United States (approximately 50 grains m<sup>-3</sup>). In the California subregion, ENF emissions are  
207 comparatively low (< 50 grains m<sup>-3</sup>) which is likely due to the bias in sampling locations.

208 The grasses (Poaceae) have comparatively low average pollen counts (<25 grains m<sup>-3</sup>) throughout the season in all  
209 subregions except the Northwest, where the maximum reaches 75 grains m<sup>-3</sup>. However, the average maximum  
210 Poaceae pollen count at individual stations is close to 100 grains m<sup>-3</sup>, with the individual annual maxima reaching  
211 several hundreds of pollen grains m<sup>-3</sup>. In the AAAAI data, there are two distinct maxima in the Northeast Poaceae  
212 count, and we attribute the first seasonal maximum to C<sub>3</sub> grasses (peak around day 155) and the second grass  
213 maximum mainly to C<sub>4</sub> grasses (peak around day 250). Observations by *Craine et al.* (2011) of Poaceae in an  
214 American prairie have indicated that C<sub>3</sub> and C<sub>4</sub> grass flowering occurs at distinctly different times, with C<sub>3</sub> in the  
215 late spring and C<sub>4</sub> in mid- to late summer. Similarly, Medek et al. (2016) observed two grass pollen peaks in  
216 Australia, with a stronger, late-summer peak at lower Southern latitudes where there is higher incidence of C<sub>4</sub> grass.  
217 However, the authors note that sometimes this may be due to a second flowering of some C<sub>3</sub> grass species. Although  
218 the C<sub>3</sub>-C<sub>4</sub> separation cannot be confirmed in the AAAAI pollen count data, because they are not distinguished during  
219 pollen identification, this distinction is included in the model as discussed in Sections 3.1 and 4.2 below. In the  
220 Southeast, this separation of the Poaceae pollen counts is less apparent because both of the emission maxima are  
221 broader and intersect one another. In the Southeast, the first observed pollen maximum (assessed as C<sub>3</sub> grass pollen)  
222 peaks earlier around day 140, while the second maximum (assessed as C<sub>4</sub> grasses) have a similar, yet smaller value  
223 around day 250. In the Mountain subregion, the first grass maximum occurs later in the year (day 175) and the  
224 second grass maximum occurs around day 250 in the late summer. Pollen counts in California are only substantial  
225 during the earlier flowering time (C<sub>3</sub> grasses) and have a similar duration to the Northeast, peaking at around day  
226 135. For the Pacific Northwest, there is one strong early peak of grass pollen in the middle of the summer (day 170)  
227 and a secondary maximum is negligible, although counts below 10 grains m<sup>-3</sup> register around days 250-270.

228 Ragweed (*Ambrosia*) pollen is segregated from other grasses and herbs because of the strong allergic response in  
229 humans to this specific species and the unique timing of emissions. Because it is a short-day plant (i.e. its  
230 phenology driven by a shortening photoperiod and cold temperatures (Deen et al. 1998)), ragweed pollen seasons  
231 are generally constrained to the late summer with the exception of the Mountain region where some counts occur in  
232 the spring. Emissions in the Northeast reach a maximum around day 240 at 60 grains m<sup>-3</sup> while they occur slightly

Matthew Wozniak 8/2/2017 5:18 PM  
Deleted: climatological

Matthew Wozniak 8/7/2017 10:17 AM  
Moved (insertion) [1]

Matthew Wozniak 8/7/2017 10:17 AM  
Deleted: at

Matthew Wozniak 8/7/2017 10:17 AM  
Deleted: at

Matthew Wozniak 8/7/2017 10:17 AM  
Moved up [1]: In the AAAAI data, there are two distinct maxima in the Northeast Poaceae count, and we attribute the first seasonal maximum to C<sub>3</sub> grasses (peak at day 155) and the second grass maximum to C<sub>4</sub> grasses (peak at day 250).

Matthew Wozniak 8/7/2017 10:45 AM  
Deleted:

Matthew Wozniak 8/7/2017 10:45 AM  
Deleted: itself

244 later in the Southeast, peaking around day 270 with twice the magnitude (120 grains m<sup>-3</sup>). Ragweed pollen in the  
245 Mountain subregion with an expected peak at around day 245, but also an earlier peak at around day 130 with no  
246 confirmed cause. *Ambrosia* is not detected in the station averages for California and the Pacific Northwest, although  
247 some individual sites in these regions record relatively low counts on the order of 10 grains m<sup>-3</sup>.  
248

Matthew Wozniak 8/2/2017 5:18 PM

Deleted: climatological

### 249 3 Model input data

#### 250 3.1 Land cover data

251 With a goal of developing regional to global pollen emissions, one of the greatest limitations is the description of  
252 vegetation at the appropriate taxonomic level and spatial resolution. While land cover databases specific to species  
253 level are available for some regions, they are not available globally. Alternatively, vegetation land cover in regional  
254 to global models can be represented by classifications based on biophysical characteristics. For climate models, a  
255 common approach to represent land cover is with plant functional types (PFT), and global PFT data is readily  
256 available and used by many regional and global climate models to describe a variety of terrestrial emissions  
257 (Guenther et al. 2006) and biophysical processes in land-atmosphere exchange models. The creation of a pollen  
258 emissions model with PFT categorization would be of use at a broad range of spatial scales and domains while  
259 integrating more readily with climate models. In the pollen emissions model development and evaluation (Sections  
260 4 and 5), we compare two different vegetation descriptions of broadleaf deciduous and evergreen needleleaf trees  
261 including (1) family- or genus-specific land cover and (2) land cover categorized by PFT.

262 The Biogenic Emissions Landuse Database [version 3](#) (BELD) provides vegetation species distributions [at 1 km](#)  
263 [resolution](#) over the continental United States based [on satellite imagery, aerial photography and ground surveys, as](#)  
264 [well as other land cover classification data such as geographical boundaries](#) (Kinnee et al. 1997;  
265 <https://www.epa.gov/air-emissions-modeling/biogenic-emissions-landuse-database-version-3-beld3>). The BELD  
266 database includes 230 different tree, shrub and crop taxa across the United States as a fraction of the grid cell area at  
267 either the genus or species level. For family and genus level pollen emissions, the BELD land cover fraction for the  
268 11 dominant pollen-emitting tree taxa identified in Section 2.1 is utilized (Table 1; Figure 3). For species level land  
269 cover data, land cover fraction is calculated as the aggregate of all species within a family or genus.

270 For the PFT land cover, we use the Community Land Model 4 (CLM4) (Oleson et al. 2010) surface dataset that  
271 employs a 0.05° resolution satellite-derived land cover fraction from the International Geosphere Biosphere  
272 Programme (IGBP) classification (Lawrence and Chase 2007). We sum all three biome PFT categories (temperate,  
273 tropical and boreal) for deciduous broadleaf forests (DBF) and two biome PFT categories (boreal and temperate) for  
274 evergreen needleleaf forests (ENF) to produce the model PFT land cover.

275 Figures 4a-d compare the BELD land cover (summed by PFT) and [CLM4](#) land cover for the two tree PFTs. [Region](#)  
276 [by region comparison of land cover for all BELD taxa and each tree PFT \(from both BELD and CLM4\) is given in](#)  
277 [Table 2](#). An important distinction is that CLM4 land cover extends beyond U.S. borders because it is derived from a  
278 global dataset, whereas BELD is constrained to the continental United States. BELD and [CLM4](#) land cover show

Matthew Wozniak 8/10/2017 3:03 PM

Deleted: CLM4

Matthew Wozniak 8/10/2017 3:06 PM

Deleted: IGBP

282 general agreement on the regional distribution of both tree PFTs. DBF is predominantly in the eastern portion of the  
 283 United States with a gap in the Midwestern corn belt. ENF is present in the Southeast, the Northeast along the U.S.-  
 284 Canadian border, along the Cascade and Coastal mountain ranges and throughout the northern Rockies. A notable  
 285 difference is the [CLM4](#) representation of ENF, which shows a strong, dense band extending from the Sierra Nevadas  
 286 through the Canadian Rockies. The BELD ENF broadly covers the Rocky Mountain Range, yet more diffusely (land  
 287 cover percentage up to 76%), whereas the [CLM4](#) dataset shows sparser and dense ENF land cover (e.g., up to 100%)  
 288 in the same range. For the DBF category, another notable difference is that the strong band of oaks around the  
 289 Central Valley of California, which is evident in BELD but missing from the [CLM4](#) data set. Additionally, the  
 290 [CLM4](#) has far greater densities of DBF along the Appalachian range than BELD. Overall, the [CLM4](#) land cover  
 291 fractions for forest PFTs are higher on average than the summed BELD taxa, [about 2 to 10 times as much in each](#)  
 292 [region, with the exception of California subregion DBF where CLM4 landcover is about half of that in the BELD](#)  
 293 [dataset \(Table 2\).](#)

294 Grass spatial distributions are given by C<sub>3</sub> (non-arctic) and C<sub>4</sub> grass PFT land cover classes from [CLM4](#) (Figure  
 295 4e,f), which correspond to the observed family-level Poaceae pollen subdivided into C<sub>3</sub> and C<sub>4</sub> categories (described  
 296 in Section 2.2). C<sub>3</sub> coverage is evident across the United States, with broad coverage throughout the Southeast,  
 297 Midwest, and northern Great Plains (Fig. 4e). C<sub>4</sub> coverage is concentrated in the Southeast and Southern Great  
 298 Plains at lower densities (Fig. 4f).

299 Ragweed requires a different land cover [treatment](#), as land cover distributions are not available for ragweed across  
 300 the entire continental United States. Ragweed is known to arise in areas of human disturbances (Forman and  
 301 Alexander 1998; Larson 2003), and is found mainly in disturbed or developed areas such as cities and farms (Katz et  
 302 al. 2014; Clay et al. 2006). *Ambrosia* land cover (Figure 4g) is derived from the urban and crop categories of the  
 303 CLM4 land cover, which are sourced from LandScan 2004 (Jackson et al. 2010) and the [CLM4](#) datasets,  
 304 respectively. The urban data is subdivided by urban intensity, which is determined by population density. We  
 305 assume that ragweed is unlikely to grow in the densest of urban areas (such as city centers), and utilize the lowest  
 306 urban density category that is also the most widespread. Ragweed land cover (plants m<sup>-2</sup>) in urban areas is  
 307 determined by multiplying the average urban ragweed stem density given by *Katz et al. (2014)* by the urban land  
 308 cover fraction. For crops, the [CLM4](#) subdivides land cover fraction into categories including corn and soybean  
 309 crops, and *Clay et al. (2006)* provide ragweed stem densities in soybean and corn cropland. Thus, we calculate the  
 310 ragweed land cover [in stems m<sup>-2</sup> \(\*f<sub>rag</sub>\*\)](#):

$$(1) f_{rag} = \alpha(d_{soy}f_{soy} + d_{corn}f_{corn}) + \beta(d_{urb}f_{urb})$$

311 where  $d_{soy}$ ,  $d_{corn}$  and  $d_{urb}$  represent the stem density (stems m<sup>-2</sup>) of ragweed in soybean, corn and urban areas,  
 312 respectively, and the  $f_{soy}$ ,  $f_{corn}$  and  $f_{urb}$  represent the fractional land cover for soybean, corn and urban, respectively.  $\alpha$   
 313 and  $\beta$  are tuning parameters to that are determined by a preliminary evaluation between modeled and observed  
 314 ragweed pollen counts, where  $\alpha=0.01$  for crop and  $\beta=0.1$ . *Zink et al. (2017)* show that a ragweed land cover  
 315 representation developed by combining land use and local pollen count information evaluates better against  
 316 observed pollen counts than even ragweed ecological models, giving confidence to this choice of land cover  
 317 representation.

Matthew Wozniak 8/10/2017 3:06 PM  
 Deleted: IGBP

Matthew Wozniak 8/10/2017 3:06 PM  
 Deleted: IGBP

Matthew Wozniak 8/8/2017 12:47 PM  
 Deleted: more

Matthew Wozniak 8/10/2017 3:06 PM  
 Deleted: IGBP

Matthew Wozniak 8/9/2017 9:39 PM  
 Deleted: fraction

Matthew Wozniak 8/9/2017 9:39 PM  
 Deleted:  $LC_{rag}$

329 All land cover data are regridded to a 25 km resolution across the United States to provide emissions at the same  
330 spatial resolution as the regional climate model (see Section 5).

331

### 332 3.2 Meteorological data for phenology

333 To develop the emissions model, we use two sources of meteorological data. The first is a high-resolution  
334 meteorological dataset to develop the phenological relationships for the timing of pollen release. Because reliable  
335 measurements are not available at all pollen count stations and there is uncertainty in the siting of these stations  
336 (e.g., they may be in urban areas with highly heterogeneous temperature), we use a gridded observational  
337 meteorological product for consistency across all sites (Maurer et al. 2002). The gridded Maurer dataset interpolates  
338 station data to a 1/8° grid across the continental United States on a daily basis, representing a high spatial resolution  
339 gridded data product where data from each [meteorological](#) station has been subject to consistent quality control.

340 Higher resolution DayMet temperatures (daily 1 km) (Thornton et al. 2014) were used in lieu of Maurer data at  
341 NAB sites where the Maurer dataset did not provide information at the collocated grid cell (Table S1). For offline  
342 emission calculations input into the regional climate model, we use annual-average temperatures computed from  
343 monthly Climate Research Unit (CRU) temperature data (Harris et al. 2014). This data was interpolated from a  
344 0.5°x0.5° grid to the 25 km regional climate model grid used for pollen transport.

345

## 346 4 PECM model description

### 347 4.1 Emission potential

348 The pollen emissions model is a prognostic description of the potential emissions flux of pollen ( $E_{pot}$ ; grains  $m^{-2} d^{-1}$ )  
349 for an individual taxon  $i$ :

$$(2) E_{pot,i}(x,y,t) = f_i(x,y) \frac{p_{annual,i}}{\int_0^{365} \gamma_{phen,i}(x,y,t) dt} \gamma_{phen,i}(x,y,t)$$

350 for a model grid cell of location  $x$  and  $y$  at time  $t$ . In this expression,  $f(x,y)$  is the vegetation land cover fraction  
351 (Section 2.1;  $m^2$  vegetated  $m^{-2}$  total area),  $p_{annual}$  is the daily production factor (grains  $m^{-2} yr^{-1}$ ), and  $\gamma_{phen}$  is the  
352 phenological evolution of pollen emissions that controls the release of pollen (description below). Equation 2 can  
353 apply to either a single taxa or PFT, depending on the prescription of land cover through  $f(x,y)$ . In the simulations  
354 described here, emissions are calculated offline based on this equation and provided as input to a regional climate  
355 model (RCM). This emission potential is later adjusted based on meteorological factors in the RCM where the  
356 pollen grains are transported as aerosol tracers (Section 5.1.1). In the future, Equation 2 can be coupled directly  
357 within the climate model for online calculation of emissions. The phenological and production factors are described  
358 in greater detail below.

Matthew Wozniak 8/2/2017 7:12 PM

Deleted: met

360 **4.2 Phenological factor ( $\gamma_{phen}$ )**

361 Based on the observed pollen counts, a Gaussian distribution is used to model the phenological timing of pollen  
362 release ( $\gamma_{phen}$ ):

$$(3) \gamma_{phen,t}(x, y, t) = e^{-\frac{(t-\mu(x,y))^2}{2\sigma(x,y)^2}}$$

363 where  $\mu(x,y)$  and  $\sigma(x,y)$  are the mean and half-width of the Gaussian, respectively, and can be determined based on  
364 the start day-of-year (sDOY) and end day-of-year (eDOY) calculated by an empirical phenological model:

$$(4) \mu(x,y) = \frac{sDOY(x,y) + eDOY(x,y)}{2}$$

$$(5) \sigma(x,y) = \frac{eDOY(x,y) - sDOY(x,y)}{a}$$

365 The fit parameter,  $a$ , accounts for the conversion between the empirical phenological dates based on a pollen count  
366 threshold and the equivalent width of the emissions curve. Based on evaluation versus observations,  $a = 3$  was  
367 selected for initial offline simulations.

368 Linear regressions of observed sDOY and eDOY from individual pollen count stations versus temperature are used  
369 to empirically determine sDOY and eDOY that drive  $\gamma_{phen}$ . An important criteria is the grain count used to determine  
370 the sDOY and eDOY, and we utilize a count threshold adaptable to bimodal emission patterns such as those noted  
371 for *Ulmus* and Poaceae. *Softey et al.* (2013) selected dates on which the 5th and 95th percentile of the annual index  
372 (annual sum of pollen counts) were reached, while *Liu et al.* (2016) combined a 5 grains m<sup>-3</sup> threshold with the  
373 additional condition that 2.5% (97.5%) of the annual sum of pollen was reached before the start (end) date. Here,  
374 we implement a pollen count threshold of 5 grains m<sup>-3</sup> and found this was sufficient to reproduce the observed  
375 seasonal cycle. To account for smaller signals that may be due to count errors (e.g., an exceedance of the 5 grains m<sup>-3</sup>  
376 threshold but not followed by an increase in emissions), we used a moving window with a threshold of 25 grains  
377 m<sup>-3</sup> for the sum of pollen counts in the nearest 10 neighboring days; when the sum of the neighbors failed to meet  
378 this threshold, the data point was omitted. In this manner, we calculated the sDOY and eDOY for the full 8-year  
379 time series for each taxon at each station. If more than one start or end date was found in a single year at a single  
380 station for a taxon that was not clearly bimodal, only the first set of dates was retained for the linear regression. For  
381 taxa with an observed bi-modal peak, the second peak was treated as a separate taxon (e.g. early and late *Ulmus*, C<sub>3</sub>  
382 and C<sub>4</sub> Poaceae) with a separate phenology. Once the sDOY and eDOY were determined, outliers in these dates  
383 were determined by bounding the data for each taxon at four times the mean absolute deviation of sDOY and eDOY.  
384 Near surface atmospheric temperature (e.g., 2m height) is an important factor of vegetation phenology. In the  
385 interest of having a regional model of emissions that prognostically calculates the start dates, the previous year  
386 annual average temperature (PYAAT) based on near-surface atmospheric temperature from *Maurer et al.* (2002) and  
387 *Thornton et al.* (2014) (Section 2.2) is the explanatory variable in the linear regressions. For example, for a start  
388 date of February 2, 2007, the PYAAT would be the mean temperature for the year 2006. For *Pinus* and  
389 Cupressaceae, PYAAT is calculated differently from July 1, 2005 - June 30, 2006 because emissions of these  
390 families begin in the early winter (December). Prior studies have shown that the meteorology of the year previous  
391 to the pollen season influences pollen production, especially temperature, suggesting that PYAAT may be a good

Matthew Wozniak 8/25/2017 1:31 PM

Deleted: -

Matthew Wozniak 8/25/2017 1:31 PM

Deleted: -

394 | [predictor variable \(Menzel and Jochner 2016\)](#). While emissions in this study are calculated using offline  
395 | meteorological data, this also could be coupled to a dynamic land surface model to predict reasonably accurate  
396 | pollen phenological dates.

397 | To exemplify this method, Figure 5 shows the phenological dates and regression lines for the *Betula* (birch) genus,  
398 | with all 13 modeled taxon shown in Figures S1 and S2. The sDOY and eDOY of the pollen season show a moderate  
399 | and considerable trend with temperature for most taxa and PFTs (Table 1; Figures S1 & S2). The linear regression  
400 | models for sDOY explain 41% of the variance on average for DBF taxa, 47% on average for ENF taxa, 48% for C<sub>3</sub>  
401 | Poaceae, and 8% for *Ambrosia* while having a negligible R<sup>2</sup> for C<sub>4</sub> Poaceae. For eDOY, the linear regression models  
402 | explain 21% of the variance on average for DBF taxa, 29% for ENF, 4% for C<sub>3</sub> Poaceae, 32% for C<sub>4</sub> Poaceae, and  
403 | 37% for *Ambrosia*. All trends except C<sub>4</sub> Poaceae, late elm, and *Ambrosia* are negative, indicating that warmer  
404 | previous-year temperatures result in earlier start and end dates. For most tree taxa, the trend of both sDOY and  
405 | eDOY are negatively correlated with PYAAT, with a steeper negative slope for sDOY. The correlation for the  
406 | duration of the pollen season (eDOY – sDOY) is then positive for all taxa except Cupressaceae. This suggests that  
407 | warmer climates have earlier pollen season start and end dates but longer season lengths.

408 | [Trends for grass in Australasia show that the correlation of the end date of the pollen season with average spring  
409 | temperature is positive, while the same relationship for the start date is negative, suggesting also that season start  
410 | dates are earlier and season duration increases with warmer climates](#) (Medek et al. 2016). [The apparent trend in the  
411 | season end date for \*Ambrosia\* with PYAAT could be due to the increased number of frost-free days, consistent with  
412 | global warming, and a strong relationship between frost-free days and changes of ragweed season length](#) (Easterling  
413 | 2002; Ziska et al. 2011).

414 | This agrees with [earlier findings](#) that suggest the pollen season will, on average, start earlier with a warmer global  
415 | climate and have a longer duration (Confalonieri et al. 2007). [The spatiotemporal heterogeneity of climate change  
416 | may affect which regions and seasons will be most influenced by climate change](#) (Ziska 2016). In fact, there is  
417 | imperfect agreement that earlier start dates and longer seasons will occur unanimously throughout the United States  
418 | region, [at least for trees](#) (Yue et al. 2015). It is understood that photoperiod and the dormancy-breaking process  
419 | controlled by chilling temperatures play a significant role [in the phenology of trees](#) (Myking and Heide 1995; Ziska  
420 | 2016), and it is generally accepted that a plethora of other factors, such as plant age, mortality, and nutrient  
421 | availability also affect observed phenological dates (Jochner et al. 2013). However, even without these factors, the  
422 | current phenological model is applicable to large regions and provides a clear response of plants to inter-annual  
423 | climate variability as well as long-term climate changes. For this first assessment of PECM, we assume that the  
424 | pollen production factor ( $p_{\text{annual}}$ ) does not change with time and that the phenological model described above  
425 | captures the main features of pollen emissions.

#### 426 | 4.3 Annual pollen production ( $p_{\text{annual}}$ )

427 | [Annual production factors \(grains m<sup>-2</sup> year<sup>-1</sup>, where m<sup>2</sup> refers to vegetated area, or grains stem<sup>-1</sup> year<sup>-1</sup> for ragweed\)  
428 | for each modeled taxon are provided in Table 1.](#) The annual pollen production factor ( $p_{\text{annual}}$ ) [defines the amount of  
429 | pollen produced per vegetation biomass per year based on literature values.](#) [Tormo Molina et al. \(1996\)](#) report the

Matthew Wozniak 8/25/2017 1:30 PM

Deleted:

Matthew Wozniak 8/16/2017 2:33 PM

Deleted: A shows

Matthew Wozniak 8/16/2017 2:36 PM

Deleted: ,

Matthew Wozniak 8/16/2017 3:13 PM

Deleted: the

Matthew Wozniak 8/16/2017 2:38 PM

Deleted: of other empirical modeling studies

Matthew Wozniak 8/7/2017 1:52 PM

Deleted: Though such an outcome is more intuitive,



437 annual pollen productivity in grains tree<sup>-1</sup> year<sup>-1</sup> measured from three representative trees from several taxa. Morus  
438 has no known reference for production factor and was assumed to be 10x10<sup>7</sup> grains m<sup>-2</sup> year<sup>-1</sup>, conservatively at the  
439 low end of the range for other deciduous broadleaf taxa. Other tree taxa and grasses are reported in grains m<sup>-2</sup> year<sup>-1</sup>,  
440 while ragweed is reported in grains stem<sup>-1</sup> year<sup>-1</sup>. (Helbig et al. 2004; Jato, Rodríguez-Rajo, and Aira 2007; Hidalgo,  
441 Galán, and Domínguez 1999; Prieto-Baena et al. 2003; Fumanal, Chauvel, and Bretagnolle 2007). To convert the  
442 production factors from Tormo Molina et al. (1996) (grains tree<sup>-1</sup> year<sup>-1</sup>), the production factors for each  
443 representative tree are multiplied by the tree crown area, calculated as the circular area of the tree crown diameter  
444 given in Table II of Tormo Molina et al. (1996). The resulting individual production factors (grains m<sup>-2</sup> year<sup>-1</sup>) are  
445 then averaged for each taxa.

446 \_\_\_\_\_ After sensitivity experiments of running pollen emissions in RegCM4, we find that the literature value of  
447 p<sub>annual</sub> for Poaceae provides better agreement with observations for C<sub>4</sub> grass when reduced by a factor of 10, thus we  
448 use this value. To obtain the coefficient of daily pollen production over the duration of the phenological curve,  $\gamma_{phen}$ ,  
449 the integral of the daily pollen production is normalized to p<sub>annual</sub> as demonstrated by Equation 2.

#### 450 4.4 Offline emissions simulations

451 We calculate emissions offline for two versions of PECM that differ in the land cover input data for woody plants.  
452 The first uses the detailed BELD tree database (Figure 3) for tree pollen emissions (hereinafter the “BELD”  
453 simulation), and the second uses globally based PFT data for tree pollen emissions (Figures 4b and 4d) (hereinafter  
454 the “PFT” simulation). For the grass and ragweed taxa, the emissions calculations are identical between the two  
455 simulations as the input land cover is the same for these two categories. While the family and genus level is useful  
456 for the allergen community, the respective taxon land cover databases needed to develop a global, adaptable model  
457 are not always available. While many plant traits are found to vary quite strongly within individual PFTs (Reichstein  
458 et al. 2014), the PFT convention is accepted and remains in use in climate models, particularly because of the lack of  
459 species-level land cover data at large scales. For the PFT version, pollen counts from individual taxa were summed  
460 within each PFT prior to calculation of the phenological regression (Table 1). We exclude the bimodality in *Ulmus*  
461 for the PFT version because it is the only tree taxon that exhibits this behavior, and late *Ulmus* pollen emissions are  
462 relatively small compared to the major DBF season. The production factors for each PFT are calculated as the  
463 unweighted average of the production factors for all the taxa within the PFT (Table 1).

464 Figures 6-11 show the monthly averages of the 2003-2010 emissions potential calculated by the offline models  
465 described in Section 4.1 ( $E_{pot}$ , Equation 2). The seasonal cycle can be clearly identified in the emissions potential,  
466 with the onset of pollen emissions beginning in the warmer south and moving northward along the gradient of  
467 annual average temperature. Colder locales such as those at high elevations can interrupt this general trend. Though  
468 pollen seasons generally end later in the colder parts of the domain just as they start later, modeled pollen emission  
469 seasons tend to be shorter at colder locations for most taxa (about 1 day per 1°C, on average). The highest maximum  
470 emissions for DBF occur over the Appalachian range between April and May for both the BELD and PFT versions  
471 (Figures 6 and 7). For ENF, the maximum occurs in April in the American West for the BELD version where  
472 Cupressaceae land cover is dominant, while it is consistent in magnitude between the Southeast and West Coast for

Matthew Wozniak 8/25/2017 12:59 PM

Deleted: a number of

Matthew Wozniak 8/25/2017 1:00 PM

Deleted: .

Matthew Wozniak 8/10/2017 1:53 PM

Deleted: The

Matthew Wozniak 8/23/2017 11:39 AM

Deleted: similar to

Matthew Wozniak 8/17/2017 8:57 PM

Deleted: other tree taxa, grasses and ragweed are reported in either grains

Matthew Wozniak 8/9/2017 9:42 PM

Deleted: per tree or stem, or grains per unit vegetated area

Matthew Wozniak 8/17/2017 8:55 PM

Deleted: All values are converted to an annual production factor (grains m<sup>-2</sup> year<sup>-1</sup>) for each modeled taxon (Table 2).

Matthew Wozniak 8/25/2017 1:03 PM

Deleted: Tormo Molina et al.

Matthew Wozniak 8/17/2017 9:00 PM

Deleted: for C<sub>4</sub> grass

Matthew Wozniak 8/17/2017 9:00 PM

Deleted: in

Matthew Wozniak 8/25/2017 1:04 PM

Deleted: climatology

488 the PFT-based version (Figures 8 and 9). The grass PFT maximum emissions occur in June in the northern Rockies  
489 for C<sub>3</sub> and in September in the South-Central Great Plains for C<sub>4</sub> (Figure 10). Ragweed pollen emissions reach their  
490 maximum during September throughout the Corn Belt where soybean and corn crops dominate the land surface,  
491 with local maxima apparent in urban centers (Figure 11).  
492

## 493 5 Emissions implementation and evaluation

### 494 5.1 Emissions implementation in a regional climate model

495 To evaluate PECM, emissions calculated offline are included within a regional climate model to compare simulated  
496 atmospheric pollen concentrations with ground-based observations from the NAB pollen network. The two  
497 phenological pollen emissions estimates (BELD and PFT) described above are prescribed as daily emissions, after  
498 which they are scaled by meteorological factors and undergo atmospheric transport. We use the Regional Climate  
499 Model version 4 (Giorgi et al. 2012), which is a limited-area climate model that includes a coupled aerosol tracer  
500 module (Solmon et al. 2006) that readily accommodates pollen tracers (Liu et al. 2016). The pollen tracer transport  
501 scheme is extended from one to four bins in this study to simulate the four PFTs (DBF, ENF, GRA, and RAG), with  
502 tracer bin particle effective diameters of 28 μm, 40 μm, 35 μm and 20μm, respectively. Additionally, the temporal  
503 emissions input is updated to accommodate daily pollen emissions (grains m<sup>-2</sup> day<sup>-1</sup>).

504 RegCM4 is based on the hydrostatic version of the Penn State/NCAR mesoscale model MM5 (Grell et al. 1994) and  
505 configured for long-term climate simulations. In our RegCM4 configuration, we use the Community Land Model  
506 version 4.5 (CLM4.5; (Oleson et al. 2010)), the Emanuel cumulus precipitation scheme over land and ocean  
507 (Emanuel 1991), and the SUBEX resolvable scale precipitation (Pal et al. 2000). The horizontal resolution is 25-km  
508 with 144x243 grid cells on a Lambert Conformal Projection centered on 39°N, 100°W with parallels at 30°N and  
509 60°N (Figure 1). The vertical resolution includes 18 vertical sigma levels. Boundary conditions are driven by ERA-  
510 Interim Reanalysis while sea surface temperatures are prescribed from NOAA Optimum Interpolation SSTs (Dee et  
511 al. 2011; Smith et al. 2008). Two 8-year simulations of pollen emissions and transport in RegCM4 were conducted  
512 from 2003-2010 with the BELD and PFT version of the offline emissions model. Six months of spin-up (July-  
513 December 2002) are run for both simulations that we exclude from the following analysis.

514 In the model, we calculate the fate of four pollen tracers corresponding to the four PFTs (DBF, ENF, GRA and  
515 RAG) from the PECM offline emissions. Because individual tracers add to the computational cost of the  
516 simulations, BELD-based tree emissions are summed into DBF and ENF PFTs before they are emitted into the  
517 model atmosphere. To calculate the emissions, the emission potential calculated offline for each PFT ( $E_{pot}$ ) is scaled  
518 according to surface meteorology following the methods of *Sofiev et al.* (2013):

$$(5) E_{pollen,i}(x, y, t) = E_{pot,i}(x, y, t) f_w f_r f_h$$

$$(6) f_w = 1.5 - e^{-(u_{10} + u_{conv})/5}$$

519

520

Matthew Wozniak 8/9/2017 9:46 PM

Deleted: and

$$(7) f_r = \begin{cases} 1, & pr < pr_{low} \\ \frac{pr_{high} - pr}{pr_{high} - pr_{low}}, & pr_{low} < pr < pr_{high} \\ 0, & pr > pr_{high} \end{cases}$$

$$(8) f_h = \begin{cases} 1, & rh < rh_{low} \\ \frac{rh_{high} - rh}{rh_{high} - rh_{low}}, & rh_{low} < rh < rh_{high} \\ 0, & rh > rh_{high} \end{cases}$$

522 where  $f_w$ ,  $f_r$ , and  $f_h$  are the wind, precipitation and humidity factors, respectively. The meteorological parameters in  
 523 these equations are from online RegCM variables, including  $u_{10}$  and  $u_{conv}$  as the 10-meter horizontal wind speed and  
 524 vertical wind speed, and  $pr$  and  $rh$  are precipitation and relative humidity with low and high thresholds. These  
 525 scaling factors account for the effects of wind, precipitation and humidity on the emission of pollen from flowers  
 526 and cones. The humidity and precipitation factors are piecewise linear functions of the near-surface (10 m) RH and  
 527 total precipitation and range from 0 (high precipitation or humidity) to 1 (no precipitation or low humidity). The  
 528 wind factor ranges from 0.5 to 1.5, as even in calm conditions turbulent motions can trigger pollen release with high  
 529 winds releasing more pollen. These scaled emissions are then transported according to the tracer transport equation  
 530 (Equation 9) of *Solmon et al. (2006)* that includes advection, horizontal and vertical diffusion ( $F_H$  and  $F_V$ ),  
 531 convective transport ( $T_c$ ), as well as wet ( $R_{wls}$  and  $R_{wc}$ , representing large scale and convective precipitation  
 532 removal) and dry deposition ( $D_d$ ) of an individual tracer ( $\chi$ ), represented by  $i = 1$  to 4 for each PFT pollen emission:

$$(9) \frac{\partial \chi^i}{\partial t} = \bar{V} \cdot \nabla \chi^i + F_H^i + F_V^i + T_c^i + S^i - R_{wls}^i - R_{wc}^i - D_d^i$$

### 533 5.1 Model evaluation against observations

534 We evaluate the efficacy of PECM in simulating the timing and magnitude of pollen emissions across the  
 535 continental United States by evaluating RegCM4 tracer concentrations versus observations. We compare the [average](#)  
 536 [daily](#) simulated near-surface pollen counts and observed, ground-based pollen counts for each of the four modeled  
 537 PFTs (Figure 12). The [observed pollen time series in Figure 12](#) are the [spatial average of the average daily pollen](#)  
 538 [counts](#) at all pollen counting stations comprising each of the five major U.S. subregions (Section 2.2) and are  
 539 compared with the modeled [average daily pollen counts](#), which averages the individual grid cells that contain the  
 540 pollen counting stations. Interannual variability is assessed using the relative mean absolute deviation for each day  
 541 of the [average time series](#). The inter-annual variability in observed daily pollen counts throughout the year is, on  
 542 average, 81, 78, 78 and 77% of the mean (DBF, ENF, grass and ragweed, respectively), while this variability from  
 543 the simulations is 53% for the BELD version of the DBF model and 61% for the PFT version, 55% and 92% for the  
 544 BELD and PFT versions of the ENF model, 43% for grasses, and 49% for ragweed (Figure 12). This indicates that  
 545 the model is capturing the relative inter-annual variability of the pollen counts between PFTs, but not all of the  
 546 variability in pollen counts from season to season. The unexplained variability in pollen concentrations could be due  
 547 to the lack of sensitivity of annual pollen production factor to the environment, as this may be closely tied with  
 548 precipitation (Duhl et al. 2013) or temperature (Jochner et al. 2013). Additionally the [average observed and](#)  
 549 [simulated pollen counts](#) are analyzed using box-and-whisker plots to assess the models' representivity of pollen

Matthew Wozniak 8/2/2017 5:20 PM

Deleted: daily climatology of

Matthew Wozniak 8/2/2017 5:24 PM

Deleted:

Matthew Wozniak 8/2/2017 5:21 PM

Deleted: climatological

Matthew Wozniak 8/2/2017 5:21 PM

Deleted: daily climatology

Matthew Wozniak 8/25/2017 1:07 PM

Deleted: climatology

Matthew Wozniak 8/2/2017 5:25 PM

Deleted: climatology

Matthew Wozniak 8/2/2017 5:26 PM

Deleted: climatological

Matthew Wozniak 8/2/2017 5:26 PM

Deleted: is

558 count magnitude in spite of phenology (Figure 13). These metrics are discussed in detail by PFT and U.S. subregion  
559 below.

### 560 5.2.1 DBF

561 In the Northeast, the BELD model captures both the observed seasonal timing and the magnitude of DBF pollen  
562 counts (Figure 12a). Observed DBF phenology is also simulated by the PFT-based emissions with even greater  
563 statistical accuracy in reproducing the observed pollen counts, though the BELD model more accurately reproduces  
564 the annual maximum (Figure 13a). The accuracy in this subregion is not surprising, as Northeastern pollen counting  
565 stations contributed the greatest number of data points to the phenological regression analyses. Observed DBF  
566 pollen counts in the Southeast have a large maximum that is greater than the average seasonal maximum of all four  
567 other subregions and all three other PFTs (Figure 12b), which is predominantly from *Quercus*. Neither the BELD  
568 nor PFT version of the simulation recreates this sharp peak, but they do simulate a large majority of the pollen count  
569 distribution (Figure 13b), especially the PFT-based model for which the lower 75% of simulated average pollen  
570 counts agrees well with the lower 75% of observed average pollen counts. The PFT model does not specifically  
571 resolve *Quercus*, and while the BELD model does resolve *Quercus*, it fails to model this maximum. This may be  
572 because the linear regression producing the phenological dates is an average, where a longer season may result from  
573 earlier start dates and/or later end dates that will reduce the maximum of the Gaussian distribution of pollen counts  
574 in the time series. In the Mountain region, there is an observed maximum early in the spring that is not simulated by  
575 either model because the DBF phenology at several cold Mountain sites is exceptionally early, and falls well below  
576 the regression lines (Figures S1, S2). However, both the BELD and PFT model simulate the second Mountain  
577 subregion peak with the correct magnitude. The BELD simulated maximum DBF in California is about 40 days later  
578 than the observed peak, also due to the regionally anomalous phenology in California as compared with the rest of  
579 the U.S., and though the PFT model peaks much closer to the observations, it underestimates DBF pollen counts. In  
580 the Pacific Northwest, the observed pattern is quite similar to the DBF pollen phenology in the Mountain subregion  
581 with only a slightly weaker early spring peak due to low-elevation pollen. The observed phenological pattern (Fig.  
582 12e) and pollen count magnitudes (Fig. 12e) are both more accurately simulated by the BELD model, likely due to  
583 the earlier spring maximum that does not appear in the PFT simulation.

### 584 5.2.2 ENF

585 Like DBF, the BELD ENF in the Northeast is well represented by simulating two distinct Cupressaceae and  
586 Pinaceae maxima, although the model slightly underestimates observed Pinaceae pollen counts (Figure 12f). The  
587 PFT model ENF phenology emits from the start of the earlier Cupressaceae season to the end of the later Pinaceae  
588 season, while overestimating the maximum pollen count by about a factor of 2. In the Southeast, the winter peak is  
589 not captured by the model phenology (Figure 12g). However, the spring Pinaceae maximum is accurately captured  
590 by the BELD simulation. The PFT model follows the observed Pinaceae phenology more closely, though  
591 overestimating pollen counts by a factor of 2 to 3 and estimating a later ending date by about 40 days. In the  
592 Mountain subregion, ENF start and end dates are simulated by the BELD model with improved accuracy than the

Matthew Wozniak 8/2/2017 5:26 PM  
Deleted: climatological

Matthew Wozniak 8/2/2017 5:27 PM  
Deleted: climatological

Matthew Wozniak 8/2/2017 5:27 PM  
Deleted: climatological

Matthew Wozniak 8/8/2017 1:01 PM  
Deleted: which

Matthew Wozniak 8/10/2017 2:28 PM  
Deleted: maxima in

Matthew Wozniak 8/10/2017 2:48 PM  
Deleted: due to negligible BELD land cover fractions for Cupressaceae (Figure 4c)

600 DBF phenology in this subregion, though the predicted spring maximum is later than observed (Figure 12h). As with  
601 DBF, there is good agreement between the BELD model with the later part of the season in this subregion. The PFT  
602 model, again, simulates the peak ENF emissions in the later part of the season and overpredicts the pollen counts by  
603 a factor of 2 to 3. In the California subregion, the tails of the pollen distributions by both models closely resemble  
604 the pollen count magnitudes, yet the majority of these pollen counts (the top 75%, Figure 13i) lie above the observed  
605 maximum (Figure 12i). Finally, in the Pacific Northwest, the BELD model phenology shows some agreement with  
606 the model mean (Figure 13j), with the simulated pollen count showing a stronger Gaussian distribution than  
607 observed (Figure 12j). In contrast, the PFT model grossly overpredicts the observed pollen counts by up to a factor  
608 of 10 at its maximum, likely due to the greater representation of the ENF PFT than the BELD model in this region.  
609 The simulated [average](#) start date of the PFT model is within a few days of the observed [average](#) start date, while the  
610 end date is about 20 days later than observed.

### 611 5.2.3 Grasses

612 Grass phenology across all subregions for both C<sub>3</sub> and C<sub>4</sub> types is captured by the emissions estimates (Figure 12 k-  
613 o). However, the pollen count magnitude in Northeastern C<sub>3</sub> grass peak is overestimated by about a factor of seven,  
614 even when using the minimum value of the annual production factor in the range estimated by *Prieto-Baena* (2003)  
615 (Figure 12k). The secondary peak, which we attribute to C<sub>4</sub> grasses and is only about half as large, is well-  
616 represented. In the Southeast, the simulated pollen count magnitudes are much closer to observations, while the C<sub>3</sub>  
617 peak is overestimated here by only a factor of 2 and the C<sub>4</sub> peak is within 5 grains m<sup>-3</sup> (Figure 12l). In this region,  
618 the observed duration of the pollen emissions is not fully captured by the simulated grass phenology in the  
619 Southeast, and this is probably due to the non-Gaussian shape of the observed time series. In the Mountain  
620 subregion, the C<sub>3</sub> pollen count is overestimated by the model, but the phenology is represented by a gradual rise in  
621 low emissions beginning in March to match the maximum burst of emissions in June (Figure 12m). C<sub>4</sub> grass pollen  
622 counts are not simulated in the Mountain region due to the relatively low C<sub>4</sub> land cover in the [CLM4](#) dataset (Figure  
623 4f). In California there is a single observed grass peak, which the model attributes to C<sub>3</sub> pollen, and the peak count  
624 in the simulation is about 5 days late and about 2 to 10 times too large (Figure 12n). In the Pacific Northwest, the  
625 [average](#) C<sub>3</sub> season is accurately simulated with the exception that the phenology is shifted 20 days earlier than  
626 observed (Figure 12o). A small C<sub>4</sub> peak in the observations at around day 260 is not simulated in this region due to  
627 negligible land cover for C<sub>4</sub> grasses in the [CLM4](#) land cover data (Figure 4f).

### 628 5.2.4 Ragweed

629 Simulated ragweed phenology in the Northeast, Southeast, and Mountain subregions follows the observed  
630 phenology [of late-summer ragweed](#) very closely, where the peaks of both the simulated and the observed [time series](#)  
631 [averages](#) occur within a day of each other (Figures 12p-t). Close evaluation of each regional phenological time series  
632 reveals that many of the observed features, like those determined by the rate of increase or decrease of the pollen  
633 count, are reproduced by the model. The magnitude of the modeled ragweed maxima in the Northeast and Mountain  
634 subregions is slightly greater than observed (Figures 12p and 12r), while there is a clear underestimation by a factor

Matthew Wozniak 8/2/2017 5:27 PM

Deleted: climatological

Matthew Wozniak 8/2/2017 5:27 PM

Deleted: climatological

Matthew Wozniak 8/10/2017 3:06 PM

Deleted: IGBP

Matthew Wozniak 8/2/2017 5:27 PM

Deleted: climatological

Matthew Wozniak 8/10/2017 3:06 PM

Deleted: IGBP

Matthew Wozniak 8/2/2017 5:28 PM

Deleted: climatology

641 of 4 or 5 in the Southeast (Figure 12q). There is a yet unidentified observed spring peak of ragweed pollen at about  
642 day 125 in the Mountain subregion, possibly due to an identification error. The observed average ragweed pollen  
643 counts in California and the Pacific Northwest are negligible, though the simulation predicts them to be similar in  
644 magnitude and timing to the other three subregions (Figure 12s and 12t). These discrepancies may be due to the  
645 land use description developed for ragweed (Section 3.1), which may overestimate the ragweed potential in the  
646 western United States, or potentially the relatively sparse observational stations in these regions may be poorly placed  
647 relative to emissions sources.  
648

Matthew Wozniak 8/2/2017 5:28 PM  
Deleted: climatological

## 649 **6 Conclusions**

650 We have developed a climate-flexible pollen emissions model (PECM) for the 13 most prevalent wind-pollinating  
651 taxa in the United States based on observed pollen counts. PECM was adapted to the PFT categorization common to  
652 climate and Earth system models with four major temperate-zone PFTs (DBF, ENF, grasses and ragweed), thus it is  
653 possible to apply this model to larger geographic regions where specific taxon-level data is unavailable. We  
654 evaluated PECM using a regional climate model (RegCM4) to transport emissions and evaluated resulting pollen  
655 counts versus observations. PECM generally captures the observed phenology, and observed surface pollen  
656 concentrations can be simulated within an order of magnitude. While many emissions models to date have focused  
657 on smaller geographical regions with more detailed land cover information and pollen information, this model  
658 represents the first of its kind to simulate multiple taxa over broad spatial areas. This transition to a larger scale does  
659 have its disadvantages, and we define several major sources of uncertainty to consider when scaling up pollen  
660 emissions to the regional or global scale: (1) pollen production factors, (2) climatic sensitivities in phenological  
661 timing, (3) land cover data, and (4) taxa specificity. We discuss each of these uncertainties in greater detail.

662 A large source of uncertainty is the use of a constant annual production factor for pollen (Section 4.3). It has been  
663 reported that wind-driven pollen production has increased historically and is expected, potentially, to increase in the  
664 near future (R. Zhang et al. 2014; Lake et al. 2017; Confalonieri et al. 2007; Ziello et al. 2012). Some of more  
665 effective improvements to the emission model would be to create a pollen production model that is sensitive to  
666 multiple environmental factors such as soil moisture, temperature and nutrient status (Jochner et al. 2013). The  
667 interannual variability in observed daily pollen counts is, on average, substantially greater than that of the modeled  
668 pollen counts, which is likely due to this lack of production sensitivity. The current production factors for woody  
669 plants could be enhanced by studies that extend the number of representative units (i.e. individual trees) of  
670 vegetation used to determine the average pollen production. In a PFT representation, there is an inevitable limitation  
671 to the accuracy of any single PFT's ability to account for taxa differences within the PFT. Furthermore, the current  
672 model also assumes that there are no interspecies differences that affect the performance of the BELD model as well  
673 as the PFT model, whereas in reality it may vary by an order of magnitude within a genus (Duhl et al. 2013).  
674 However, despite the assumption of a constant production factor, observed surface pollen counts for all PFTs are  
675 typically reproduced within a single order of magnitude, as apparent in emission model evaluation.

677 Second, the use of observed relationships between pollen count and temperature to determine the phenological  
678 pollen start and end date also adds uncertainty to our modeling framework. Firstly, we assume stationarity in the  
679 phenological relationships, and this assumption may be violated. Secondly, based on the subregions defined for the  
680 analysis, there appears to be a bias in the linear regressions toward subregions with more available pollen counting  
681 stations, therefore affecting performance differences in these regions. Lastly, even though generally the Gaussian  
682 time series model of the pollen phenology performs well in our analysis, in the PFT representation the Gaussian  
683 absorbs or misses some of the phenological details in the observed pollen seasonality, and in some cases taxa (e.g.  
684 grasses in the Southeast subregion) may not be captured by the existing phenology.

685 Third, the specificity of land cover data provides an important constraint in the overall simulation of emissions. The  
686 representation of land cover is a key factor to accurately capturing regional features, especially in areas with a high  
687 degree of topographical variation and therefore greater variance in the land cover. For example, we notice large  
688 differences in the two model simulations when considering tree-specific taxa, such as in the western United States  
689 for ENF (Section 5.2.2). Also, our definition of the land cover available for ragweed used assumptions based on  
690 crop cover and urban area, which overestimated emissions in the western United States (Section 5.2.4).  
691 Interestingly, even though ragweed lacks an exact spatial distribution, distinct observed features of the ragweed  
692 phenology in three of the five subregions emerged using the current ragweed land cover parameterization.

693 Fourth, the aggregation of emissions to the PFT level affects the representativeness of the production factors,  
694 phenology and land cover. When comparing the two models of the tree pollen (BELD versus PFT), the individual  
695 phenology of each of the 11 tree taxa are resolved by the BELD simulation, whereas they are either folded into or  
696 excluded from the single phenology modeled by the PFT simulation. This results from either treating the taxa in the  
697 phenological regressions individually, as in the BELD model, or as a sum, as in the PFT model. With a few  
698 exceptions (e.g., the ENF family distinctions), the PFT model does generally reproduce the regional phenology  
699 throughout the United States domain, which is a priority of this study.

700 Despite these limitations, the empirical formulation presented here is the first of its kind to predict a broad range of  
701 different pollen emissions across a large geographic region. Even with univariate phenology and invariable pollen  
702 production factors, the model includes seasonal dynamics sensitive to climate change consistent with observations  
703 and is also able to simulate observed pollen magnitudes. As a result, the model can be useful for **estimation** of how  
704 allergenic risk or plant reproductive potential will be redistributed by climate change, as well as studying pollen as  
705 an aerosol in the climate system. While the empirical phenological models can be reproduced for any set of regional  
706 pollen counting stations, PECM as a whole can be easily adapted to various community climate and earth system  
707 models, global and regional, to extend research on the relationships and interactions between pollen and climate.

708

## 709 **7 Code and Data Availability**

710 Source code for Pollen Emissions for Climate Models (PECM) is written as FORTRAN90 (\*.f90) and available in  
711 the supplementary material as plain text. Input data is explained in Section 3 of this manuscript.

712

Matthew Wozniak 8/2/2017 7:28 PM

Deleted: estimating

714 **8 Acknowledgements**

715 This work was supported by NSF Grant to AGS 0952659 to ALS. We thank Melissa Zagorski and Yang Li of  
716 University of Michigan for contributions to the emissions model development, and Fabien Solmon and Li Liu of the  
717 International Centre for Theoretical Physics for RegCM support and their prior work. We gratefully acknowledge  
718 the use of the American [Academy of Allergy Asthma and Immunology \(AAAAI\)](#) pollen count data, with individual  
719 station acknowledgments fully provided in Table S1.

720

Matthew Wozniak 8/2/2017 7:28 PM

Deleted: Association

Matthew Wozniak 8/2/2017 7:28 PM

Deleted: for



723 **References**

724

725 Beggs, Paul J, Branko Šikoparija, and Matt Smith. 2017. "Aerobiology in the International Journal of  
726 Biometeorology, 1957–2017." *International Journal of Biometeorology*, 1957–2017. Accessed August 8.  
727 doi:10.1007/s00484-017-1374-5.

728 Box, George E.P., Gwilym M. Jenkins, and Gregory C. Reinsel. 1994. *Time Series Analysis: Forecasting and*  
729 *Control*. Upper Saddle River, NJ: Prentice Hall. doi:10.1016/j.ijforecast.2004.02.001.

730 Cecchi, Lorenzo. 2014. "Introduction." In *Allergenic Pollen: A Review of the Production, Release, Distribution and*  
731 *Health Impacts*, edited by Mikhail Sofiev and Karl-Christian Bergmann, 1–7. New York, London: Springer  
732 Science+Business Media Dordrecht. doi:10.1007/978-94-007-4881-1.

733 Chuine, Isabelle, P. Cour, and D. D. Rousseau. 1999. "Selecting Models to Predict the Timing of Flowering of  
734 Temperate Trees: Implications for Tree Phenology Modelling." *Plant, Cell and Environment* 22 (1): 1–13.  
735 doi:10.1046/j.1365-3040.1999.00395.x.

736 Clay, S A, B Kreutner, D E Clay, C Reese, J Kleinjan, and F Forcella. 2006. "Spatial Distribution, Temporal  
737 Stability, and Yield Loss Estimates for Annual Grasses and Common Ragweed (*Ambrosia Artimisiifolia*) in a  
738 Corn/soybean Production Field over Nine Years." *Weed Science* 54 (2): 380–90.  
739 [http://www.scopus.com/inward/record.url?eid=2-s2.0-](http://www.scopus.com/inward/record.url?eid=2-s2.0-33750295452&partnerID=40&md5=6931902680ebbd9303c2bd99f3ddc4a7)  
740 [33750295452&partnerID=40&md5=6931902680ebbd9303c2bd99f3ddc4a7](http://www.scopus.com/inward/record.url?eid=2-s2.0-33750295452&partnerID=40&md5=6931902680ebbd9303c2bd99f3ddc4a7).

741 Confalonieri, U., B. Menne, R. Akhtar, K.L. Ebi, M. Hauengue, R.S. Kovats, B. Revich, and A. Woodward. 2007.  
742 "Human Health." In *Climate Change 2007: Impacts, Adaptation and Vulnerability. Contribution of Working*  
743 *Group II to the Fourth Assessment Report of the Intergovernmental Panel on Climate Change*, edited by M.L.  
744 Parry, O.F. Canziani, J.P. Palutikof, P.J. van der Linden, and C.E. Hanson, 391–431. Cambridge, UK:  
745 Cambridge University Press.

746 Craine, Joseph M, Elizabeth M Wolkovich, E Gene Towne, and Steven W Kembel. 2011. "Flowering Phenology as  
747 a Functional Trait in a Tallgrass Prairie."

748 Dee, D P, S M Uppala, A J Simmons, P Berrisford, P Poli, S Kobayashi, U Andrae, et al. 2011. "The ERA-Interim  
749 Reanalysis: Configuration and Performance of the Data Assimilation System." *Quarterly Journal of the Royal*  
750 *Meteorological Society Q. J. R. Meteorol. Soc* 137: 553–97. doi:10.1002/qj.828.

751 Deen, William, Tony Hunt, Clarence J Swanton, and William Deen. 1998. "Influence of Temperature , Photoperiod  
752 , and Irradiance on the Phenological Development of Common Ragweed (*Ambrosia Artemisiifolia*)." *Weed*  
753 *Science* 46 (5): 555–60.

754 Despres, Viviane R., J. Alex Huffman, Susannah M. Burrows, Corinna Hoose, Aleksandr S. Safatov, Galina Buryak,  
755 Janine Frohlich-Nowoisky, et al. 2012. "Primary Biological Aerosol Particles in the Atmosphere: A Review."  
756 *Tellus, Series B: Chemical and Physical Meteorology*. doi:10.3402/tellusb.v64i0.15598.

757 Duhl, T. R., R. Zhang, a. Guenther, S. H. Chung, M. T. Salam, J. M. House, R. C. Flagan, et al. 2013. "The  
758 Simulator of the Timing and Magnitude of Pollen Season (STaMPS) Model: A Pollen Production Model for  
759 Regional Emission and Transport Modeling." *Geoscientific Model Development Discussions* 6 (2): 2325–68.

760 doi:10.5194/gmdd-6-2325-2013.

761 Easterling, David R. 2002. "Recent Changes in Frost Days and the Frost-Free Season in the United States." *Bulletin*  
762 *of the American Meteorological Society* 83: 1327–1332. [http://journals.ametsoc.org/doi/pdf/10.1175/1520-](http://journals.ametsoc.org/doi/pdf/10.1175/1520-0477%282002%29083%3C1327%3ARCIFDA%3E2.3.CO%3B2)  
763 [0477%282002%29083%3C1327%3ARCIFDA%3E2.3.CO%3B2](http://journals.ametsoc.org/doi/pdf/10.1175/1520-0477%282002%29083%3C1327%3ARCIFDA%3E2.3.CO%3B2).

764 Efsthathiou, Christos, Sastry Isukapalli, and Panos Georgopoulos. 2011. "A Mechanistic Modeling System for  
765 Estimating Large-Scale Emissions and Transport of Pollen and Co-Allergens." *Atmospheric Environment* 45:  
766 2260–76. doi:10.1016/j.atmosenv.2010.12.008.

767 Emanuel, Kerry. A. 1991. "A Scheme for Representing Cumulus Convection in Large-Scale Models." *Journal of*  
768 *the Atmospheric Sciences* 48 (21): 2313–35. <ftp://texmex.mit.edu/pub/emanuel/PAPERS/convect91.pdf>.

769 Emberlin, J., J. Mullins, J. Corden, S. Jones, W. Millington, M. Brooke, and M. Savage. 1999. "Regional Variations  
770 in Grass Pollen Seasons in the UK, Long-Term Trends and Forecast Models." *Clinical and Experimental*  
771 *Allergy* 29 (3): 347–56. doi:10.1046/j.1365-2222.1999.00369.x.

772 Forman, Richard T T, and Lauren E Alexander. 1998. "ROADS AND THEIR MAJOR ECOLOGICAL EFFECTS."  
773 *Annu. Rev. Ecol. Syst* 29: 207–31.

774 Fu, Yongshuo H., Matteo Campioli, Gaby Deckmyn, and Ivan A. Janssens. 2012. "The Impact of Winter and Spring  
775 Temperatures on Temperate Tree Budburst Dates: Results from an Experimental Climate Manipulation."  
776 *PLoS ONE* 7 (10). doi:10.1371/journal.pone.0047324.

777 Fumanal, Boris, Bruno Chauvel, and Francois Bretagnolle. 2007. "ESTIMATION OF POLLEN AND SEED  
778 PRODUCTION OF COMMON RAGWEED IN FRANCE." *Ann Agric Environ Med* 14: 233–36.  
779 doi:10.1093/annonc/mdw163.

780 Galán, C, García-, H Mozo, L Vázquez, L Ruiz, C Guardia, and Díaz. 2008. "Modeling Olive Crop Yield in  
781 Andalusia, Spain." *E Agronomy Journal* 100 (1).  
782 <http://search.proquest.com/docview/194514400/fulltextPDF/5D1BBD9891A04649PQ/1?accountid=14667>.

783 García-Mozo, H., C. Galán, J. Belmonte, D. Bermejo, P. Candau, C. Díaz de la Guardia, B. Elvira, et al. 2009.  
784 "Predicting the Start and Peak Dates of the Poaceae Pollen Season in Spain Using Process-Based Models."  
785 *Agricultural and Forest Meteorology* 149 (2): 256–62. doi:10.1016/j.agrformet.2008.08.013.

786 Georg a, Grell, Jimy Dudhia, and David R Stauffer. 1994. "A Description of the Fifth-Generation Penn State/NCAR  
787 Mesoscale Model (MM5)." *NCAR Technical Note NCAR/TN-398+STR*, no. December: 121.  
788 doi:10.5065/D60Z716B.

789 Giorgi, F., E. Coppola, F. Solmon, L. Mariotti, M. B. Sylla, X. Bi, N. Elguindi, et al. 2012. "RegCM4: Model  
790 Description and Preliminary Tests over Multiple CORDEX Domains." *Climate Research* 52 (1): 7–29.  
791 doi:10.3354/cr01018.

792 Guenther, A., T. Karl, P. Harley, C. Wiedinmyer, P. I. Palmer, and C. Geron. 2006. "Estimates of Global Terrestrial  
793 Isoprene Emissions Using MEGAN (Model of Emissions of Gases and Aerosols from Nature)." *Atmospheric*  
794 *Chemistry and Physics* 6: 3181–3210. doi:10.1016/j.cognition.2008.05.007.

795 Harris, I, P D Jones, T J Osborn, and D H Lister. 2014. "Updated High-Resolution Grids of Monthly Climatic  
796 Observations – the CRU TS3 . 10 Dataset" 642 (May 2013): 623–42. doi:10.1002/joc.3711.

797 Helbig, Nora, Bernhard Vogel, Heike Vogel, and Franz Fiedler. 2004. "Numerical Modelling of Pollen Dispersion  
798 on the Regional Scale." *Aerobiologia* 3: 3–19.

799 Hidalgo, Pablo J, Carmen Galán, and Eugenio Domínguez. 1999. "Pollen Production of the Genus Cupressus."  
800 *Grana* 38 (5): 296–300. doi:10.1080/001731300750044519.

801 Hidalgo, Pablo J, Antoine Mangin, Carmen Galán, Odile Hembise, Luis M Vázquez, and Oscar Sanchez. 2002. "An  
802 Automated System for Surveying and Forecasting Olea Pollen Dispersion." *Aerobiologia* 18: 23–31.

803 Hunt, J. C. R., H. L. Higson, P. J. Walklate, and J. B. Sweet. 2002. "Modelling the Dispersion and Cross-  
804 Fertilisation of Pollen from GM Crops."

805 Jackson, Trisha L, Johannes J Feddema, Keith W Oleson, Gordon B Bonan, and John T Bauer. 2010.  
806 "Parameterization of Urban Characteristics for Global Climate Modeling."  
807 doi:10.1080/00045608.2010.497328.

808 Jato, Victoria, F. Javier Rodríguez-Rajo, and M. Jesús Aira. 2007. "Use of Phenological and Pollen-Production Data  
809 for Interpreting Atmospheric Birch Pollen Curves." *Annals of Agricultural and Environmental Medicine* 14  
810 (2): 271–80.

811 Jochner, Susanne, Josef Hofler, Isabelle Beck, Axel Gottlein, Donna Pauler Ankerst, Claudia Traidl-Hoffmann, and  
812 Annette Menzel. 2013. "Nutrient Status: A Missing Factor in Phenological and Pollen Research?" *Journal of*  
813 *Experimental Botany* 64 (7): 2081–92. doi:10.1093/jxb/ert061.

814 Katz, Daniel S W, Benjamin T. Connor Barrie, and Tiffany S. Carey. 2014. "Urban Ragweed Populations in Vacant  
815 Lots: An Ecological Perspective on Management." *Urban Forestry and Urban Greening* 13 (4). Elsevier  
816 GmbH.: 756–60. doi:10.1016/j.ufug.2014.06.001.

817 Kinnee, Ellen, Chris Geron, and Thomas Pierce. 1997. "United States Land Use Inventory For Estimating Biogenic  
818 Ozone Precursor Emissions." *Ecological Applications* 7 (1): 46.

819 Kuparinen, Anna, Tiina Markkanen, Hermanni Riikonen, and Timo Vesala. 2007. "Modeling Air-Mediated  
820 Dispersal of Spores, Pollen and Seeds in Forested Areas." doi:10.1016/j.ecolmodel.2007.05.023.

821 Lake, Iain R., Natalia R. Jones, Maureen Agnew, Clare M. Goodess, Filippo Giorgi, Lynda Hamaoui-Laguel,  
822 Mikhail A. Semenov, et al. 2017. "Climate Change and Future Pollen Allergy in Europe." *Environmental*  
823 *Health Perspectives* 125 (3): 385–91.  
824 <https://www.ncbi.nlm.nih.gov/pmc/articles/PMC5332176/pdf/EHP173.pdf>.

825 Larson, Diane L. 2003. "Native Weeds and Exotic Plants: Relationships to Disturbance in Mixed-Grass Prairie."  
826 *Plant Ecology* 169 (2): 317–33. doi:10.1023/A:1026046810307.

827 Lawrence, Peter J., and Thomas N. Chase. 2007. "Representing a New MODIS Consistent Land Surface in the  
828 Community Land Model (CLM 3.0)." *Journal of Geophysical Research: Biogeosciences* 112 (1).  
829 doi:10.1029/2006JG000168.

830 Lewis, Walter H., Prathibha. Vinay, and Vincent E. Zenger. 1983. *Airborne and Allergenic Pollen of North*  
831 *America*. Baltimore: Johns Hopkins University Press. <https://mirlyn.lib.umich.edu/Record/000779939>.

832 Linkosalo, Tapio, Hanna K Lappalainen, and Pertti Hari. 2008. "A Comparison of Phenological Models of Leaf Bud  
833 Burst and Flowering of Boreal Trees Using Independent Observations." *Tree Physiology* 28 (12): 1873–82.

834 doi:10.1093/treephys/28.12.1873.

835 Liu, Li, Fabien Solmon, Robert Vautard, Lynda Hamaoui-laguel, Csaba Zsolt Torma, and Filippo Giorgi. 2016.  
836 “Ragweed Pollen Production and Dispersion Modelling within a Regional Climate System , Calibration and  
837 Application over Europe,” 2769–86. doi:10.5194/bg-13-2769-2016.

838 Maurer, E. P., A. W. Wood, J. C. Adam, D. P. Lettenmaier, and B. Nijssen. 2002. “A Long-Term Hydrologically  
839 Based Dataset of Land Surface Fluxes and States for the Conterminous United States: Update and  
840 Extensions.” *Journal of Climate*, 3237–51. doi:http://dx.doi.org/10.1175/1520-  
841 0442(2002)015<3237:ALTHBD>2.0.CO;2.

842 Medek, Danielle E, Paul J. Beggs, Bircan Erbas, Alison K. Jaggard, Bradley C. Campbell, Don Vicendese, Fay H  
843 Johnston, et al. 2016. “Regional and Seasonal Variation in Airborne Grass Pollen Levels between Cities of  
844 Australia and New Zealand.” *Aerobiologia* 32 (2): 289–302. doi:10.1007/s10453-015-9399-x.

845 Menzel, Annette, and Susanne Jochner. 2016. “Impacts of Climate Change on Aeroallergen Production and  
846 Atmospheric Concentration.” In *Impacts of Climate Change on Allergens and Allergic Diseases*, edited by  
847 Paul J. Beggs, 10–28. Cambridge, UK: Cambridge University Press.

848 Moseholm, L., E. R. Weeke, and B. N. Petersen. 1987. “Forecast of Pollen Concentrations of Poaceae (Grasses) in  
849 the Air by Time Series Analysis.” *Pollen et Spores* 29 (2–3): 305–21.

850 Myking, T., and O. M. Heide. 1995. “Dormancy Release and Chilling Requirement of Buds of Latitudinal Ecotypes  
851 of *Betula Pendula* and *B. Pubescens*.” *Tree Physiology* 15 (11). Oxford University Press: 697–704.  
852 doi:10.1093/treephys/15.11.697.

853 Myriokefalitakis, S, G Fanourgakis, and M Kanakidou. 2017. “The Contribution of Bioaerosols to the Organic  
854 Carbon Budget of the Atmosphere.” In *Perspectives on Atmospheric Sciences*, 845–51. doi:10.1007/978-3-  
855 319-35095-0\_121.

856 Oleson, K, D Lawrence, G Bonan, M Flanner, and Kluzek E. 2010. “Technical Description of Version 4.0 of the  
857 Community Land Model (CLM).” *NCAR Technical Note NCAR/TN-478+STR*, 257.

858 Olsson, Cecilia, and Anna Maria Jönsson. 2014. “Process-Based Models Not Always Better than Empirical Models  
859 for Simulating Budburst of Norway Spruce and Birch in Europe.” *Global Change Biology*, 3492–3507.  
860 doi:10.1111/gcb.12593.

861 Pal, Jeremy S, Eric E Small, and Elfatih A B Eltahir. 2000. “Simulation of Regional-Scale Water and Energy  
862 Budgets: Representation of Subgrid Cloud and Precipitation Processes within RegCM.” *JOURNAL OF*  
863 *GEOPHYSICAL RESEARCH* 105594 (27): 579–29. http://geode.colorado.edu/~small/docs/2000JGR.pdf.

864 Prieto-Baena, José C, Pablo J Hidalgo, Carmen Galán, and Eugenio Domínguez. 2003. “Pollen Production in the  
865 Poaceae Family.” *Grana* 42 (3): 153–59.  
866 http://www.tandfonline.com/doi/pdf/10.1080/00173130310011810?needAccess=true.

867 Reichstein, Markus, Michael Bahn, Miguel D. Mahecha, Jens Kattge, and Dennis D. Baldocchi. 2014. “Linking  
868 Plant and Ecosystem Functional Biogeography.” *Proceedings of the National Academy of Sciences* 111 (38):  
869 201216065. doi:10.1073/pnas.1216065111.

870 Scheifinger, Helfried, Jordina Belmonte, Jeroen Buters, Sevcan Celenk, Athanasios Damialis, Chantal Dechamp,

871 Herminia García-Mozo, et al. 2013. "Monitoring, Modelling and Forecasting of the Pollen Season." In  
872 *Allergenic Pollen*, edited by Mikhail Sofiev and Karl-Christian Bergmann. New York, London: Springer  
873 Science+Business Media Dordrecht. doi:10.1007/978-94-007-4881-1\_4.

874 Schueler, Silvio, and Katharina Heinke Schlünzen. 2006. "Modeling of Oak Pollen Dispersal on the Landscape  
875 Level with a Mesoscale Atmospheric Model." *Environmental Modeling and Assessment* 11 (3): 179–94.  
876 doi:10.1007/s10666-006-9044-8.

877 Siljamo, Pilvi, Mikhail Sofiev, Elena Filatova, Łukasz Grewling, Siegfried Jäger, Ekaterina Khoreva, Tapio  
878 Linkosalo, et al. 2013. "A Numerical Model of Birch Pollen Emission and Dispersion in the Atmosphere.  
879 Model Evaluation and Sensitivity Analysis." *International Journal of Biometeorology* 57 (1): 125–36.  
880 doi:10.1007/s00484-012-0539-5.

881 Smith, M., and J. Emberlin. 2005. "Constructing a 7-Day Ahead Forecast Model for Grass Pollen at North London,  
882 United Kingdom." *Clinical and Experimental Allergy* 35 (10): 1400–1406. doi:10.1111/j.1365-  
883 2222.2005.02349.x.

884 Smith, Thomas M, Richard W Reynolds, Thomas C Peterson, and Jay Lawrimore. 2008. "Improvements to NOAA's  
885 Historical Merged Land-Ocean Surface Temperature Analysis (1880-2006)." *Journal of Climate* 21 (10):  
886 2283–96. doi:10.1175/2007JCLI2100.1.

887 Sofiev, M., P. Siljamo, H. Ranta, T. Linkosalo, S. Jaeger, A. Rasmussen, A. Rantio-Lehtimäki, E. Severova, and J.  
888 Kukkonen. 2013. "A Numerical Model of Birch Pollen Emission and Dispersion in the Atmosphere.  
889 Description of the Emission Module." *International Journal of Biometeorology* 57 (1): 45–58.  
890 doi:10.1007/s00484-012-0532-z.

891 Sofiev, M., P. Siljamo, H. Ranta, and A. Rantio-Lehtimäki. 2006. "Towards Numerical Forecasting of Long-Range  
892 Air Transport of Birch Pollen: Theoretical Considerations and a Feasibility Study." *International Journal of*  
893 *Biometeorology* 50 (6): 392–402. doi:10.1007/s00484-006-0027-x.

894 Sofiev, Mikhail, Jordina Belmonte, Regula Gehrig, Rebeca Izquierdo, Matt Smith, Aslog Dahl, and Pilvi Siljamo.  
895 2014. "Airborne Pollen Transport." In *Allergenic Pollen: A Review of the Production, Release, Distribution*  
896 *and Health Impacts*, edited by Mikhail Sofiev and Karl-Christian Bergman, 127–59. New York, London:  
897 Springer Science+Business Media Dordrecht. doi:10.1007/978-94-007-4881-1.

898 Sofiev, Mikhail, and Marje Prank. 2016. "Impacts of Climate Change on Aeroallergen Dispersion, Transport, and  
899 Deposition." In *Impacts of Climate Change on Allergens and Allergic Diseases*, edited by Paul J. Beggs, 50–  
900 73. Cambridge, UK: Cambridge University Press.

901 Solmon, F., F. Giorgi, and C. Lioussé. 2006. "Aerosol Modelling for Regional Climate Studies: Application to  
902 Anthropogenic Particles and Evaluation over a European/African Domain." *Tellus, Series B: Chemical and*  
903 *Physical Meteorology* 58 (1): 51–72. doi:10.1111/j.1600-0889.2005.00155.x.

904 Thornton, P.E., M.M. Thornton, B.W. Mayer, Nate Wilhelm, Yaxing Wei, Ranjeet Devarakonda, and R.B. Cook.  
905 2014. "Daymet: Daily Surface Weather Data on a 1-Km Grid for North America, Version 2. Data Set." *Oak*  
906 *Ridge National Laboratory Distributed Active Archive Center, Oak Ridge, Tennessee, USA.*  
907 doi:http://dx.doi.org/10.3334/ORNLDAAC/1219.

908 Tormo Molina, Rafael, Adolfo Muñoz Rodríguez, Silva Palacios, and Francisco Gallardo Lopes. 1996. "Pollen  
909 Production in Anemophilous Trees." *Grana* 35: 38–46. doi:10.1080/00173139609430499.

910 Weber, Richard W. 2003. "Meteorologic Variables in Aerobiology." *Immunology and Allergy Clinics of North*  
911 *America* 23 (3): 411–22. doi:10.1016/S0889-8561(03)00062-6.

912 Yue, X., N. Unger, T. F. Keenan, X. Zhang, and C. S. Vogel. 2015. "Probing the Past 30-Year Phenology Trend of  
913 US Deciduous Forests." *Biogeosciences* 12 (15): 4693–4709. doi:10.5194/bg-12-4693-2015.

914 Zhang, R., T. Duhl, M. T. Salam, J. M. House, R. C. Flagan, E. L. Avol, F. D. Gilliland, et al. 2014. "Development  
915 of a Regional-Scale Pollen Emission and Transport Modeling Framework for Investigating the Impact of  
916 Climate Change on Allergic Airway Disease." *Biogeosciences* 11 (6): 1461–78. doi:10.5194/bg-11-1461-  
917 2014.

918 Zhang, Yong, Leonard Bielory, Ting Cai, Zhongyuan Mi, and Panos Georgopoulos. 2015. "Predicting Onset and  
919 Duration of Airborne Allergenic Pollen Season in the United States." *Atmospheric Environment* 103. Elsevier  
920 Ltd: 297–306. doi:10.1016/j.atmosenv.2014.12.019.

921 Zhang, Yong, Leonard Bielory, Zhongyuan Mi, Ting Cai, Alan Robock, and Panos Georgopoulos. 2015.  
922 "Allergenic Pollen Season Variations in the Past Two Decades under Changing Climate in the United States."  
923 *Global Change Biology* 21 (4): 1581–89. doi:10.1111/gcb.12755.

924 Ziello, Chiara, Tim H Sparks, Nicole Estrella, Jordina Belmonte, Karl C Bergmann, Edith Bucher, Maria Antonia  
925 Brighetti, et al. 2012. "Changes to Airborne Pollen Counts across Europe." *PLoS ONE* 7 (4).  
926 doi:10.1371/journal.pone.0034076.

927 Zink, K., a. Pauling, M. W. Rotach, H. Vogel, P. Kaufmann, and B. Clot. 2013. "EMPOL 1.0: A New  
928 Parameterization of Pollen Emission in Numerical Weather Prediction Models." *Geoscientific Model*  
929 *Development* 6 (6): 1961–75. doi:10.5194/gmd-6-1961-2013.

930 Zink, Katrin, Pirmin Kaufmann, Blaise Petitpierre, Olivier Broennimann, Antoine Guisan, Eros Gentilini, Mathias  
931 W Rotach, Mathias W Rotach MathiasRotach, and uibkacat Katrin Zink. 2017. "Numerical Ragweed Pollen  
932 Forecasts Using Different Source Maps: A Comparison for France." *Int J Biometeorol* 61: 23–33.  
933 doi:10.1007/s00484-016-1188-x.

934 Ziska, Lewis H. 2016. "Impacts of Climate Change on Allergen Seasonality." In *Impacts of Climate Change on*  
935 *Allergens and Allergic Diseases*, edited by Paul J. Beggs, 93–112. Cambridge, UK: Cambridge University  
936 Press.

937 Ziska, Lewis, Kim Knowlton, Christine Rogers, Dan Dalan, Nicole Tierney, Mary Ann Elder, Warren Filley, et al.  
938 2011. "Recent Warming by Latitude Associated with Increased Length of Ragweed Pollen Season in Central  
939 North America." *Proceedings of the National Academy of Sciences of the United States of America* 108 (10):  
940 4248–51. doi:10.1073/pnas.1014107108.

941

942

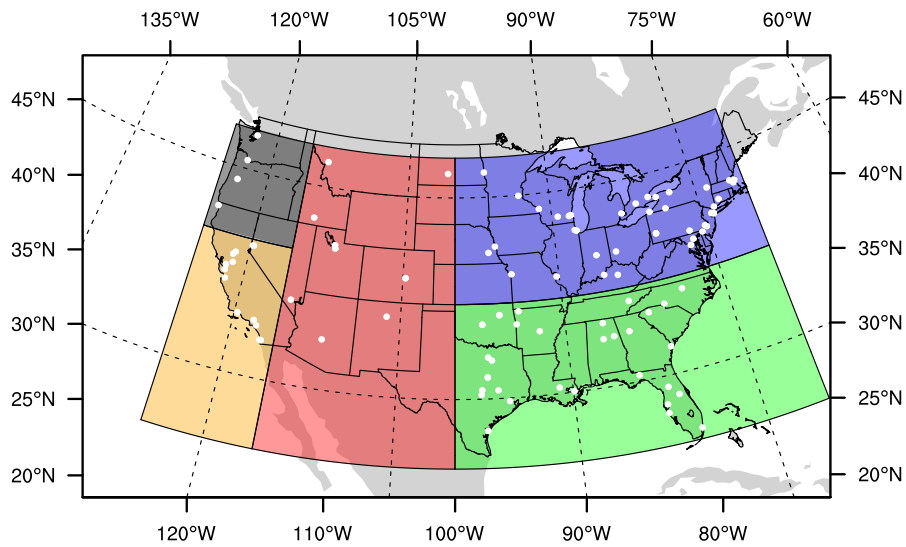

943  
944  
945  
946  
947  
948

**Figure 1.** Locations of AAAAI station locations and geographic regions used in this study: Northeast (NE; 38°-48°N, 70°-100°W) in blue, Southeast (SE; 25°-38°N, 70°-100°W) in green, Mountain (MT; 25°-48°N, 100°-116°W) in red, California (CA; 25°-40°N, 116°-125°W) in orange, and Pacific Northwest (PNW; 40°-48°N, 116°-125°W) in dark grey.

- Matthew Wozniak 8/9/2017 10:06 PM  
Deleted: >
- Matthew Wozniak 8/9/2017 10:06 PM  
Deleted: <
- Matthew Wozniak 8/9/2017 10:06 PM  
Deleted: <
- Matthew Wozniak 8/9/2017 10:07 PM  
Deleted: <
- Matthew Wozniak 8/9/2017 10:08 PM  
Deleted: W to
- Matthew Wozniak 8/9/2017 10:08 PM  
Deleted: <
- Matthew Wozniak 8/9/2017 10:08 PM  
Deleted: >
- Matthew Wozniak 8/9/2017 10:08 PM  
Deleted:
- Matthew Wozniak 8/9/2017 10:09 PM  
Deleted: >
- Matthew Wozniak 8/9/2017 10:09 PM  
Deleted: >
- Matthew Wozniak 8/9/2017 10:09 PM  
Deleted:
- Matthew Wozniak 8/2/2017 7:29 PM  
Deleted: black

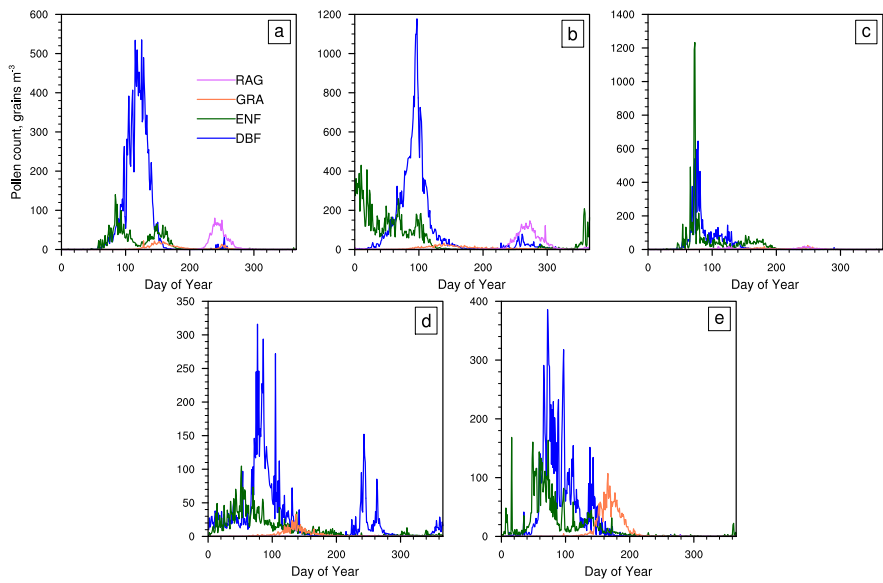

Unknown  
Formatted: Font:Bold

962 **Figure 2.** Daily observed average time series of daily pollen count data (2003-2010) for the four representative  
 963 plant functional types (DBF, ENF, grasses, ragweed) averaged over the five regions in Figure 1: (a) Northeast, (b)  
 964 Southeast, (c) Mountain, (d) California, and (e) Pacific Northwest.

Matthew Wozniak 4/28/2017 3:04 PM  
 Comment [1]: Up the font in axes.  
 Matthew Wozniak 8/8/2017 11:01 PM  
 Deleted: <sp>  
 Matthew Wozniak 8/2/2017 7:29 PM  
 Deleted: climatological  
 Unknown  
 Formatted: Font:Bold



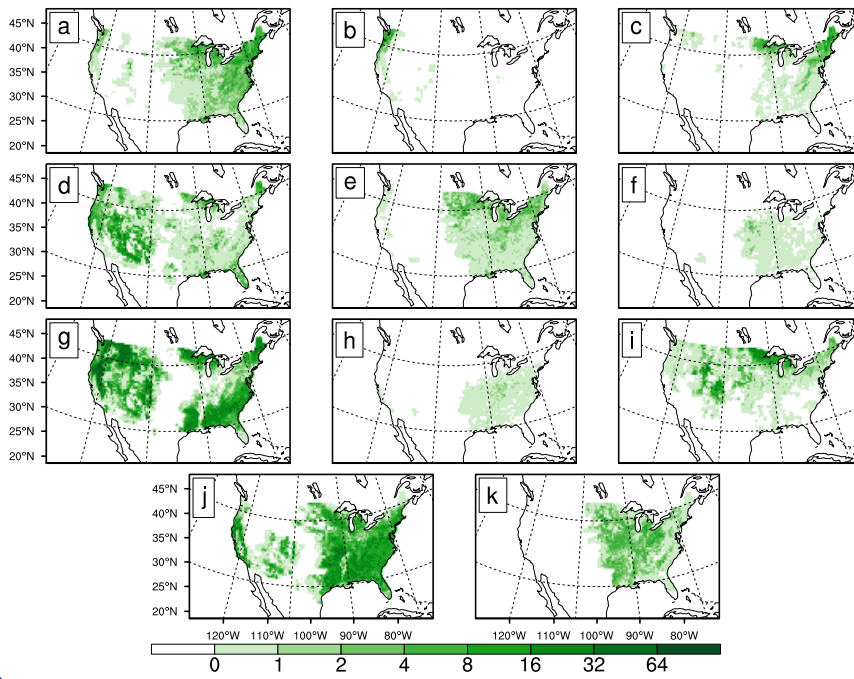

970  
971  
972  
973  
974  
975

**Figure 3.** Land cover fraction (% coverage) for 11 tree taxa from the Biogenic Emissions [Landuse Database](#) (BELD3) regridded to a 25km resolution grid, including: a) *Acer* (maple), b) *Alnus* (alder), c) *Betula* (birch), d) Cupressaceae (cedar/juniper), e) *Fraxinus* (ash), f) *Morus* (mulberry), g) Pinaceae (pine), h) *Platanus* (sycamore), i) *Populus* (poplar/aspen), j) *Quercus* (oak), k) *Ulmus* (elm).

Matthew Wozniak 8/10/2017 2:57 PM

Deleted:

Matthew Wozniak 8/2/2017 7:30 PM

Deleted: Land cover

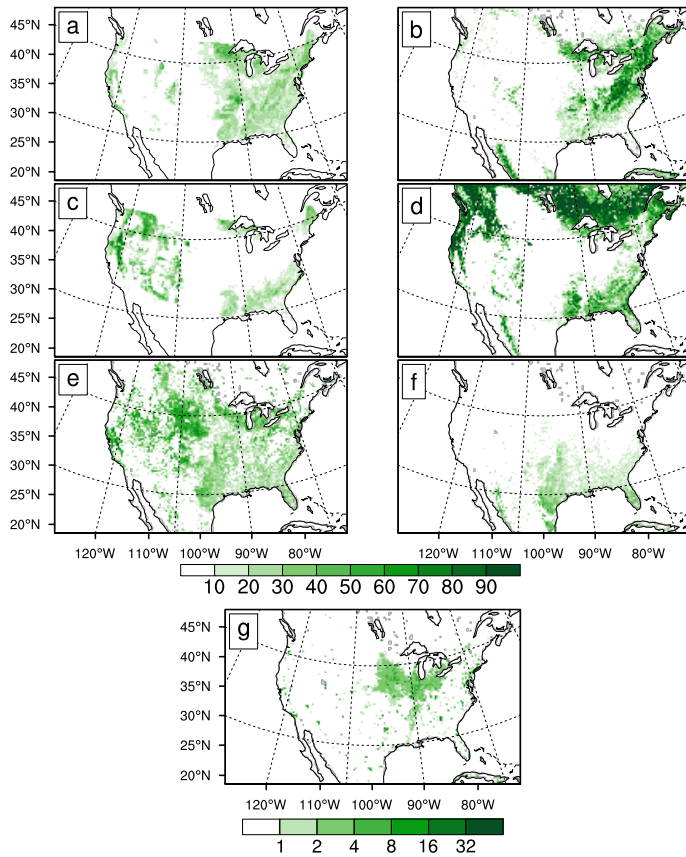

978

979

980

981

982

983

**Figure 4.** BELD3 (a, c) and CLM4 (b, d, e, f) land cover for the four PFT categories that produce pollen emissions, including (1) deciduous broadleaf forest for (a) BELD3 and (b) CLM4, (2) evergreen needleleaf forest for (c) BELD3 and (d) CLM4, (3) grasses, including (e) C3 grasses and (f) C4 grasses, and (g) ragweed, represented by crop and urban CLM4 categories.

Matthew Wozniak 8/10/2017 3:06 PM

Deleted: IGBP

Matthew Wozniak 8/10/2017 3:06 PM

Deleted: IGBP

Matthew Wozniak 8/10/2017 3:06 PM

Deleted: IGBP

Matthew Wozniak 8/2/2017 7:31 PM

Deleted: 4

Matthew Wozniak 8/10/2017 3:06 PM

Deleted: IGBP

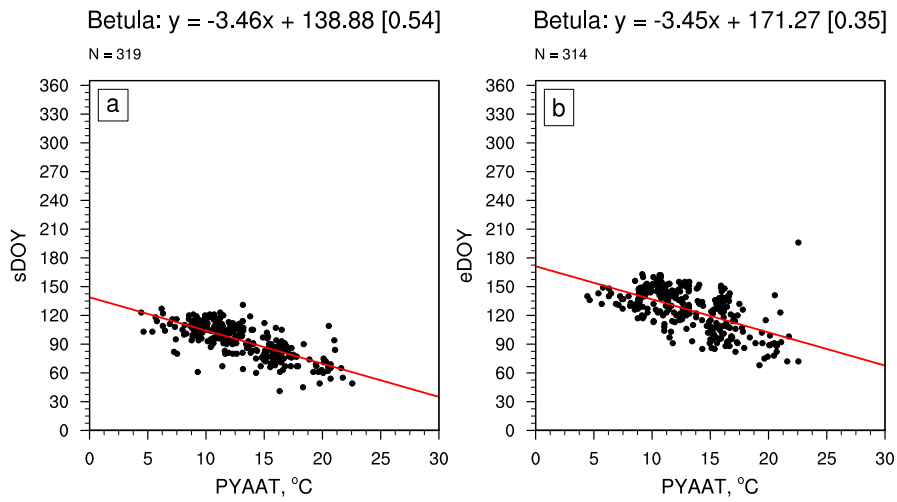

989

990 **Figure 5.** Phenological regressions for *Betula* (birch) pollen for (a) Start Day of Year (sDOY) and (b) End Day of  
 991 Year (eDOY) versus previous year annual average temperature (PYAAT; °C). Each point signifies one station per  
 992 year for pollen count data from 2003-2010 (total denoted as N).

993

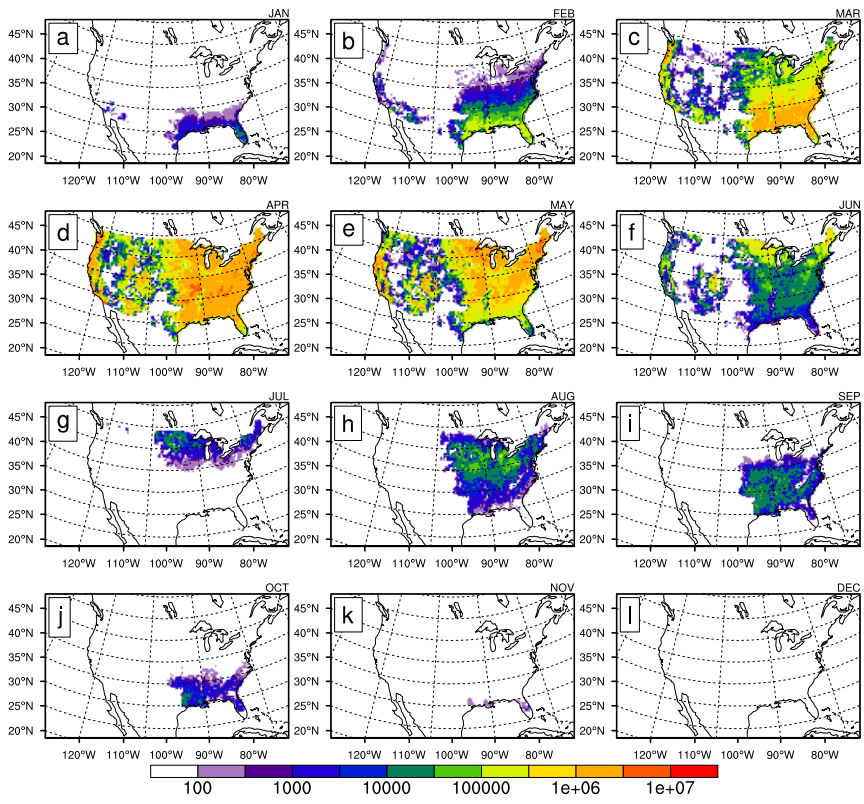

994

995 **Figure 6.** Monthly average emissions potential (E; Equation 1) for BELD model DBF (2003-2010), in grains m<sup>-2</sup>  
 996 day<sup>-1</sup>. a) January, b) February, c) March, d) April, e) May, f) June, g) July, h) August, i) September, j) October, k)  
 997 November, l) December.

998

Matthew Wozniak 8/2/2017 7:32 PM

Deleted: climatological

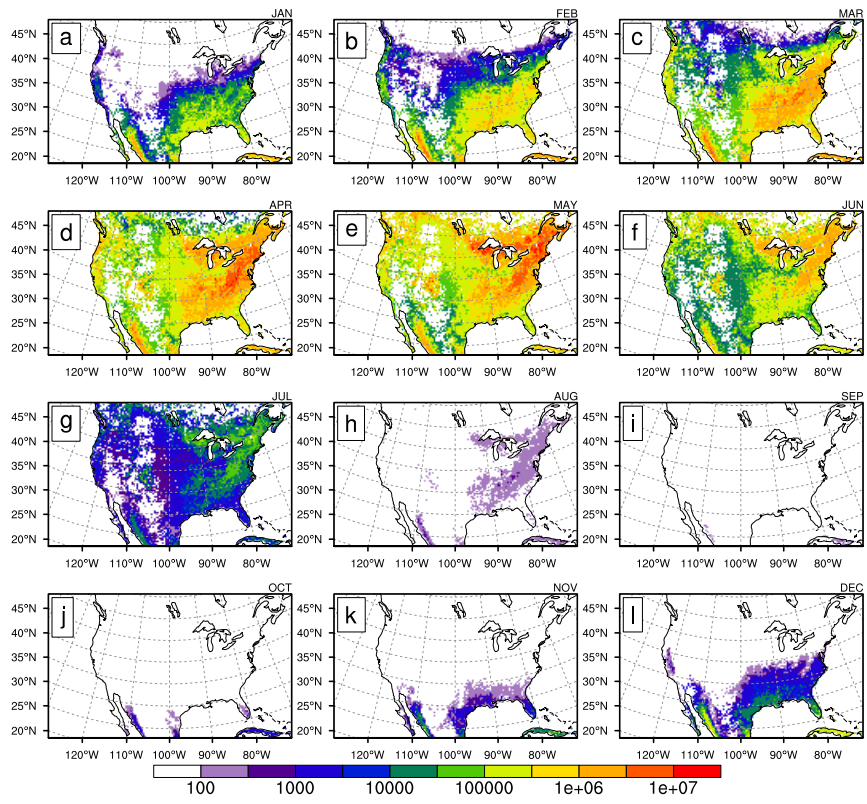

1000  
 1001  
 1002

**Figure 7.** Same as Figure 6, but for PFT model DBF.

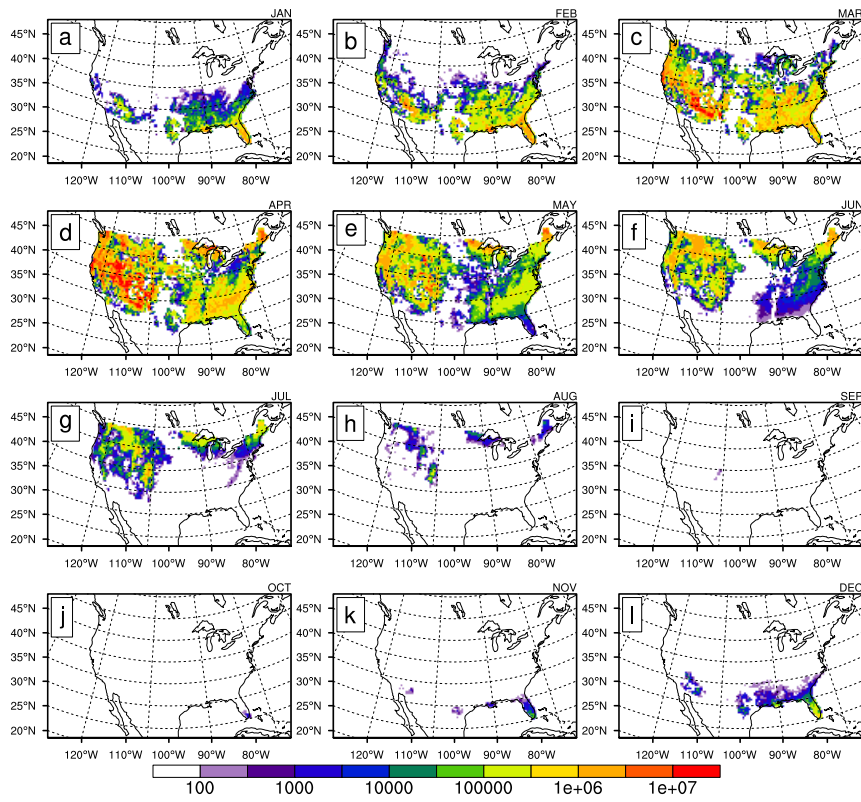

1003  
 1004 **Figure 8.** Same as Figure 6, but for BELD model ENF.  
 1005

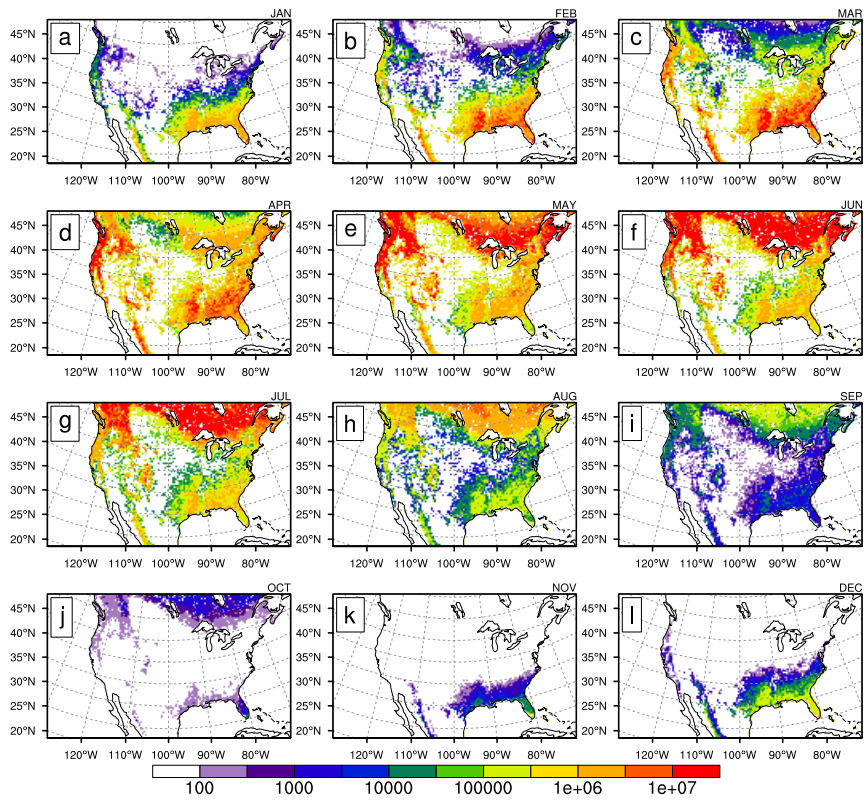

1006  
 1007  
 1008

**Figure 9.** Same as Figure 6, but for PFT model ENF.

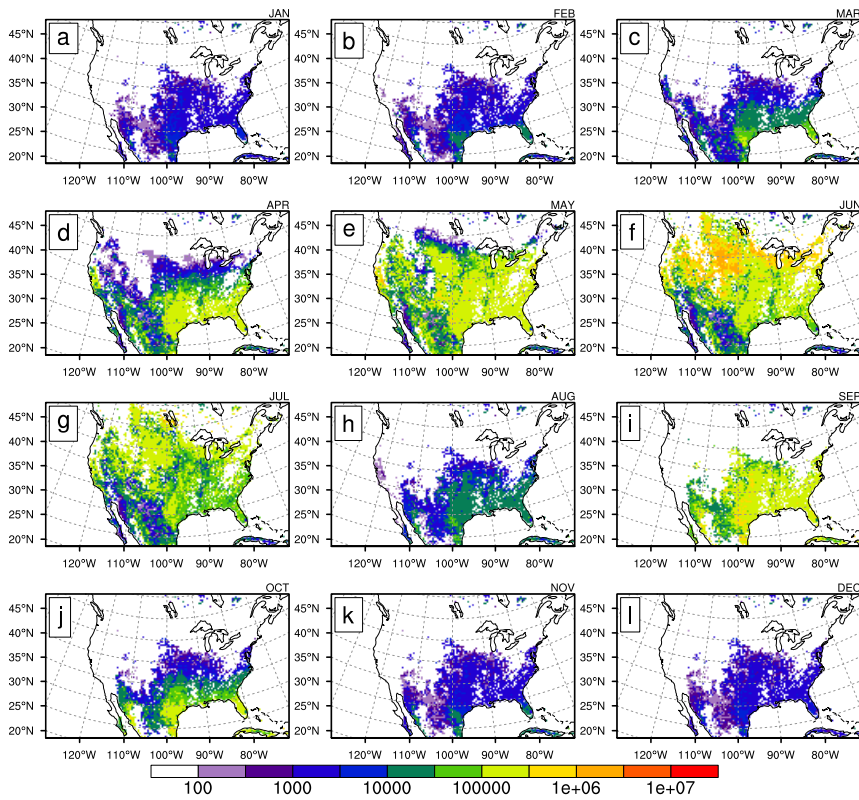

1009  
 1010 **Figure 10.** Same as Figure 6, but for  $C_3 + C_4$  grass.  
 1011



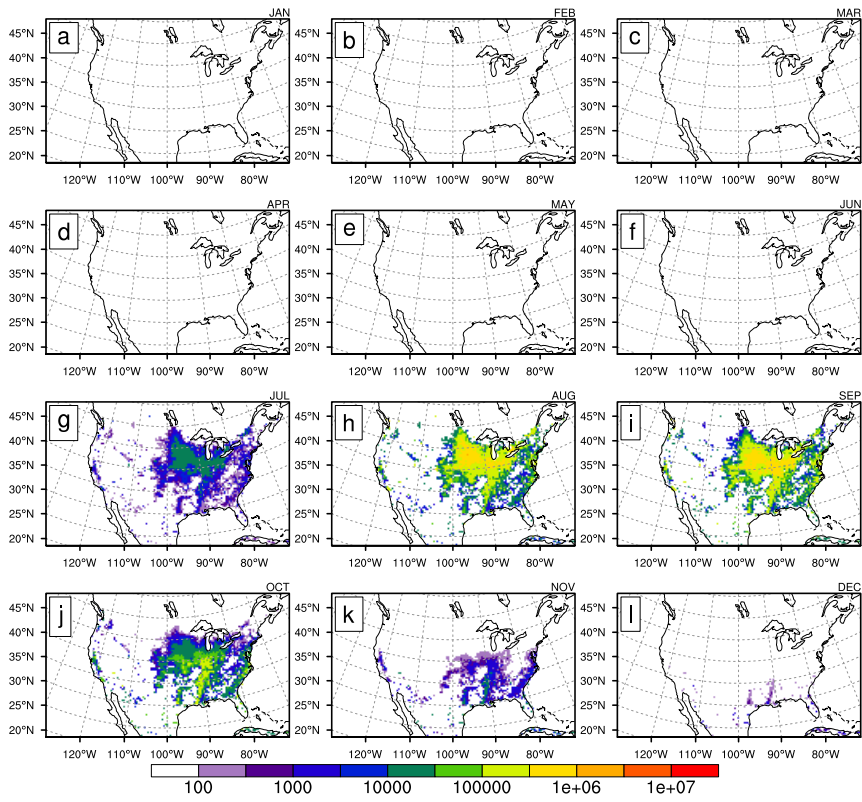

1012  
 1013 **Figure 11.** Same as Figure 6, but for ragweed.  
 1014

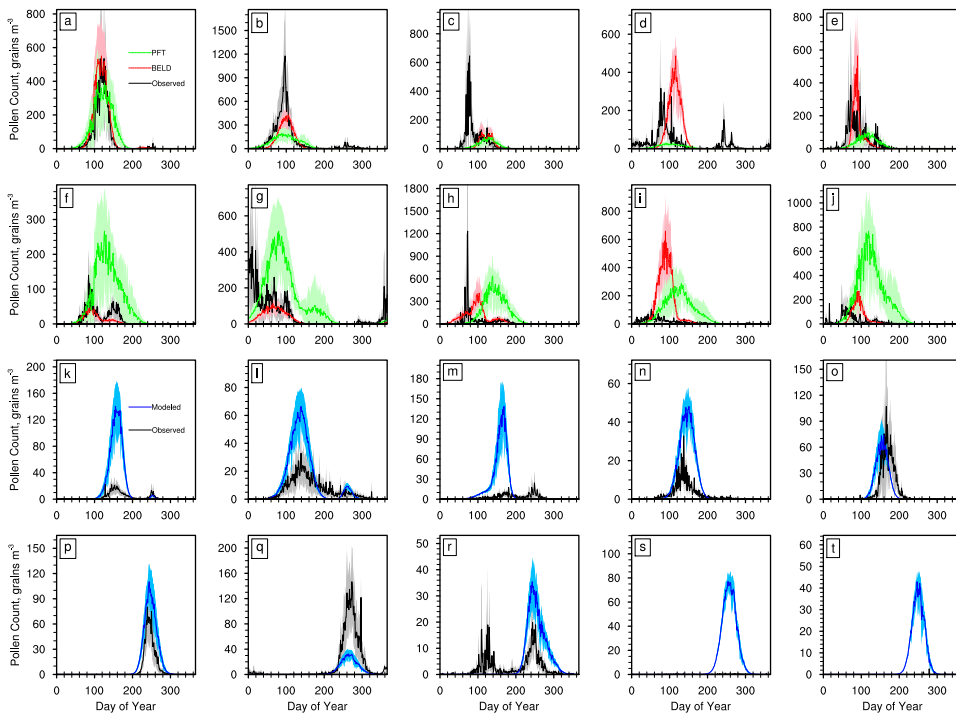

1015

1016 **Figure 12.** Average (2003-2010) time series of daily pollen counts comparing model and observations for four  
 1017 PFTs (a-e, deciduous broadleaf, DBF; f-j, evergreen needleleaf, ENF; k-o, grasses, GRA; p-t, ragweed, RAG) across  
 1018 5 U.S. subregions (columns from left to right: Northeast, NE; Southeast, SE; Mountain, MT; California; Pacific  
 1019 Northwest, PNW). Shading for the observations and model represents the mean absolute deviation from the  
 1020 average for each day of the time series. Note: scale of y-axis varies by region and PFT.

1021

Matthew Wozniak 8/8/2017 10:26 PM

Deleted:

Unknown

Formatted: Font:Bold

Matthew Wozniak 8/2/2017 7:32 PM

Deleted: Daily climatological

Matthew Wozniak 8/2/2017 7:33 PM

Deleted: u

Matthew Wozniak 8/2/2017 7:32 PM

Deleted: climatological

Matthew Wozniak 8/2/2017 7:33 PM

Deleted: climatology

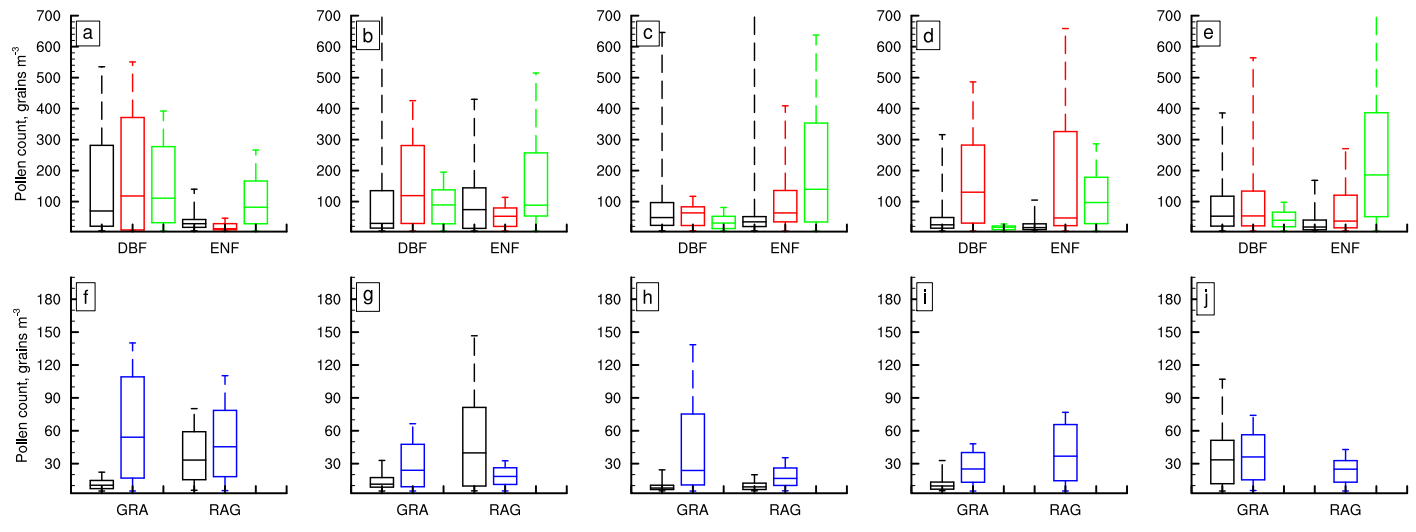

1027  
1028  
1029  
1030  
1031  
1032

**Figure 13.** Box-and-whisker plots showing the statistical spread of the pollen count magnitudes from the regional averages presented in Figure 12. Columns from left to right: Northeast, NE (a,f); Southeast, SE (b, g); Mountain, MT (c,h); California (d,i); Pacific Northwest, PNW (e,j). DBF and ENF PFTs are shown in the top row (a-e) and grass and ragweed PFTs are shown in the bottom row (f-j). Box and whiskers from bottom to top represent the minimum, lower quartile, median, upper quartile, and maximum. Maxima that are not visible in panels b, c and e are 1,177 grains m<sup>-3</sup>, 1,233 grains m<sup>-3</sup>, and 766 gains m<sup>-3</sup> respectively. All y-axes are the same scale for each row.

Matthew Wozniak 8/17/2017 8:51 PM  
Deleted:  
Matthew Wozniak 8/17/2017 8:51 PM  
Deleted: noted on plot as a number

| <u>Taxon or PFT</u>                       | P<br>10 <sup>7</sup> grains m <sup>-2</sup><br>year <sup>-1</sup> | Reference for<br>P       | sDOY<br>(slope/R <sup>2</sup> )<br>days °C <sup>-1</sup> | eDOY <sup>36</sup><br>(slope/R <sup>2</sup> )<br>days °C <sup>-1</sup> |
|-------------------------------------------|-------------------------------------------------------------------|--------------------------|----------------------------------------------------------|------------------------------------------------------------------------|
| Deciduous Broadleaf Forest (DBF)          |                                                                   |                          |                                                          |                                                                        |
| <i>Acer</i>                               | 89.1                                                              | Tormo Molina et al. 1996 | -1.78/0.15                                               | -1.56/0.06                                                             |
| <i>Alnus</i>                              | 210                                                               | Helbig et al. 2004       | -8.82/0.46                                               | -4.88/0.26                                                             |
| <i>Betula</i>                             | 140                                                               | Jato et al. 2007         | -3.46/0.54                                               | -3.45/0.35                                                             |
| <i>Fraxinus</i>                           | 45.1                                                              | Tormo Molina et al. 1996 | -4.69/0.50                                               | -2.92/0.32                                                             |
| <i>Morus</i>                              | 10                                                                | N/A                      | -4.00/0.53                                               | -2.97/0.29                                                             |
| <i>Platanus</i>                           | 121                                                               | Tormo Molina et al. 1996 | -4.47/0.40                                               | -2.65/0.20                                                             |
| <i>Populus</i>                            | 24.2                                                              | Tormo Molina et al. 1996 | -2.23/0.24                                               | -0.31/<0.01                                                            |
| <i>Quercus</i>                            | 78                                                                | Tormo Molina et al. 1996 | -4.09/0.53                                               | -2.03/0.19                                                             |
| <i>Ulmus (early,late)</i>                 | 3.55                                                              | Tormo Molina et al. 1996 | -4.61/0.59,<br>3.06/0.12                                 | -2.37/0.16,<br>5.12/0.29                                               |
| DBF                                       | 80.1                                                              |                          | -4.55/0.46                                               | -1.94/0.13                                                             |
| Evergreen Needleleaf Forest (ENF)         |                                                                   |                          |                                                          |                                                                        |
| Cupressaceae                              | 363                                                               | Hidalgo et al. 1999      | -5.67/0.48                                               | -2.67/0.17                                                             |
| Pinaceae                                  | 22.2                                                              | Tormo Molina et al. 1996 | -5.72/0.45                                               | -5.03/0.41                                                             |
| ENF                                       | 193                                                               |                          | -5.95/0.40                                               | -4.96/0.33                                                             |
| Grasses (GRA)                             |                                                                   |                          |                                                          |                                                                        |
| Poaceae (C <sub>3</sub> ,C <sub>4</sub> ) | 8.5, 0.85                                                         | Prieto-Baena et al. 2003 | -4.76/0.48,<br>0.05/<0.01                                | -1.08/0.04,<br>2.96/0.32                                               |
| Ragweed (RAG)                             |                                                                   |                          |                                                          |                                                                        |
| <i>Ambrosia</i>                           | 119 <sup>a</sup>                                                  | Fumanal et al. 2007      | 1.08/0.08                                                | 3.42/0.37                                                              |

Matthew Wozniak 8/19/2017 6:33 AM  
Deleted: (  
Matthew Wozniak 8/19/2017 6:33 AM  
Deleted: )

Allison Steiner 8/21/2017 12:42 PM  
Formatted Table  
Matthew Wozniak 8/9/2017 10:43 PM  
Deleted: "  
Matthew Wozniak 8/10/2017 4:36 PM  
Deleted: -  
Allison Steiner 8/21/2017 12:43 PM  
Formatted: Font:Not Bold

1037 <sup>a</sup>*Ambrosia* production factor in 10<sup>7</sup> grains plant<sup>-1</sup>  
1038 **Table 1:** Production factors (P) and phenological regression coefficients for the start day of year (sDOY) and end  
1039 day of year (eDOY) as a function of temperature for the 13 individual pollen-producing taxa. Individual taxa and

1044 families are organized into the four PFTs, with the two aggregated tree PFTs denoted as DBF and ENF. Regression  
1045 slope (days/°C) and coefficient of determination are provided for both sDOY and eDOY (slope/R<sup>2</sup>).

Allison Steiner 8/21/2017 12:43 PM

**Comment [2]:** No longer shaded... did you mean to exclude? Either add back in or modify the caption.

Matthew Wozniak 8/23/2017 11:40 AM

**Deleted:** in gray shading

Allison Steiner 8/21/2017 12:43 PM

**Formatted:** Font:Not Bold

| Land cover class | NE       | SE       | MT       | CA       | PNW      |
|------------------|----------|----------|----------|----------|----------|
| <i>Acer</i>      | 6.79E+04 | 2.88E+04 | 1.89E+03 | 1.97E+02 | 3.09E+03 |
| <i>Alnus</i>     | 3.37E+00 | 1.23E-01 | 6.49E+01 | 1.71E+02 | 9.56E+03 |
| <i>Betula</i>    | 2.99E+04 | 2.68E+03 | 2.78E+02 | 2.64E+00 | 4.82E+02 |
| <i>Fraxinus</i>  | 3.96E+04 | 1.10E+04 | 3.14E+03 | 3.94E+01 | 2.76E+02 |
| <i>Morus</i>     | 3.99E+03 | 2.25E+03 | 3.89E+01 | 0.00E+00 | 0.00E+00 |
| <i>Platanus</i>  | 3.18E+03 | 3.38E+03 | 1.33E+01 | 1.44E+02 | 0.00E+00 |
| <i>Populus</i>   | 5.48E+04 | 1.23E+03 | 4.37E+04 | 1.96E+02 | 1.55E+03 |
| <i>Quercus</i>   | 1.30E+05 | 2.25E+05 | 2.51E+04 | 2.82E+04 | 1.40E+04 |
| <i>Ulmus</i>     | 4.96E+04 | 2.81E+04 | 1.37E+03 | 0.00E+00 | 0.00E+00 |
| BELD DBF         | 3.79E+05 | 3.03E+05 | 7.56E+04 | 2.90E+04 | 2.90E+04 |
| CLM DBF          | 6.67E+05 | 4.03E+05 | 1.72E+05 | 7.93E+03 | 4.18E+04 |
| Cupressaceae     | 1.85E+04 | 2.11E+04 | 7.84E+04 | 9.64E+03 | 2.35E+04 |
| Pinaceae         | 8.34E+04 | 1.58E+05 | 1.79E+05 | 2.95E+04 | 1.10E+05 |
| BELD ENF         | 1.02E+05 | 1.79E+05 | 2.58E+05 | 3.91E+04 | 1.34E+05 |
| CLM ENF          | 1.44E+06 | 4.26E+05 | 4.66E+05 | 4.57E+04 | 5.34E+05 |

1047 **Table 2:** Total spatial coverage (km<sup>2</sup>) of tree taxa and PFTs from BELD and CLM land cover datasets in the 5 U.S.  
1048 subregions (Northeast, NE; Southeast, SE; Mountain, MT; California; Pacific Northwest, PNW). All individual tree  
1049 taxa are from the BELD database. BELD DBF and ENF land cover are the sums of the land cover of the taxa  
1050 belonging to each PFT.  
1051

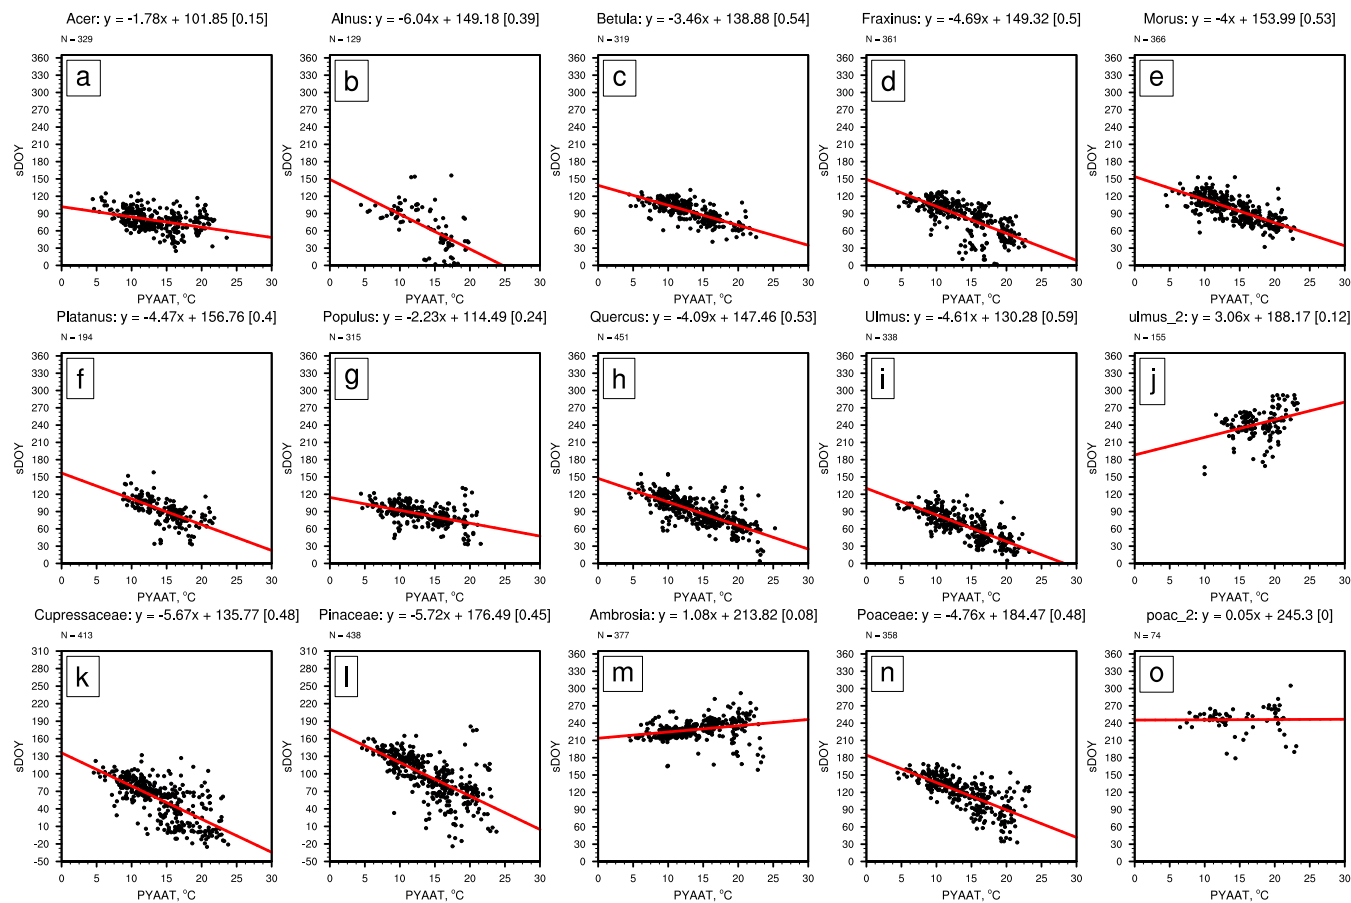

1052

1053

1054

1055

**Figure S1.** Linear regressions of the phenological relationship between start day-of-year (sDOY) and previous year annual average temperature (PYAAT) for all taxa. Each point signifies one station per year for pollen count data from 2003-2010 (total denoted as N). (j) *ulmus\_2* denotes a second (later) pollen peak in *Ulmus* and (o) *poac\_2* denotes a second (later) pollen peak in *Poaceae*.

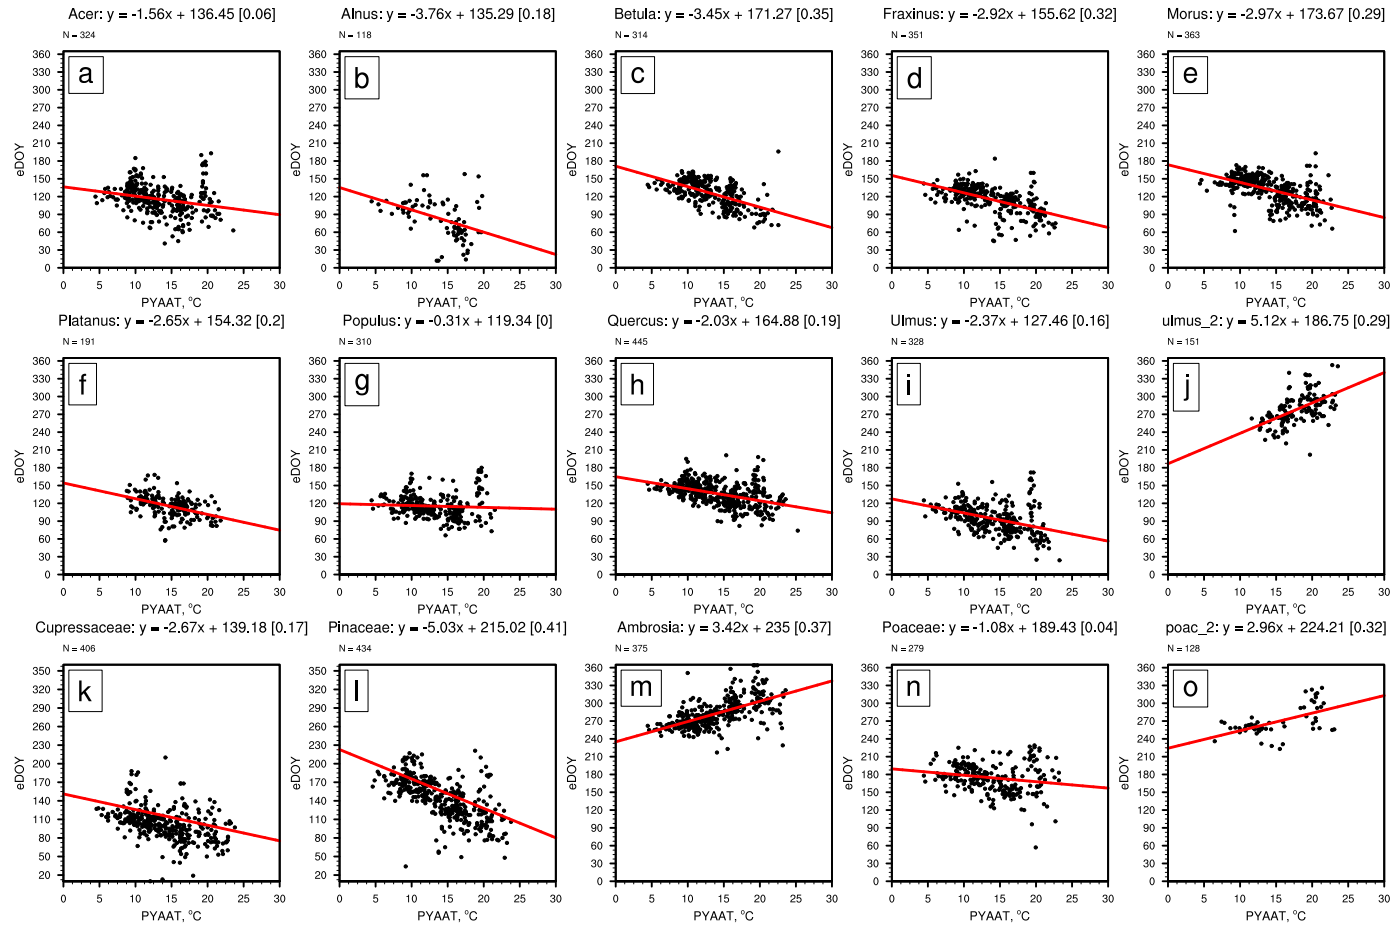

1058 **Figure S2.** Same as Figure S1, but for end day-of-year (eDOY) versus PYAAT.



| No.                   | City, State   | Latitude | Longitude | Years     | Acknowledgements                                                                                       |
|-----------------------|---------------|----------|-----------|-----------|--------------------------------------------------------------------------------------------------------|
| <b>Northeast (38)</b> |               |          |           |           |                                                                                                        |
| 1                     | Albany, NY    | 42.67    | -73.80    | 2003-2010 | David Shulan, M.D.<br>Certified Allergy Consultants<br>Albany, NY<br>Certified Allergy Consultants     |
| 2                     | Armonk, NY    | 41.13    | -73.71    | 2003-2010 | Guy Robinson, PhD<br>The Louis Calder Center<br>Armonk, NY                                             |
| 3                     | Baltimore, MD | 39.30    | -76.61    | 2003-2010 | Jonathon Matz, MD FAAAAI &<br>David Golden, MD FAAAAI<br>Dr. Golden and Dr. Matz, LLC<br>Baltimore, MD |
| 4                     | Boston, MA    | 42.35    | -71.06    | 2010      | Immunology Research Institute of New England<br>Lawrence M. DuBuske, MD FAAAAI<br>Boston, MA           |

|     |                    |       |        |                      |                                                                                              |
|-----|--------------------|-------|--------|----------------------|----------------------------------------------------------------------------------------------|
| 5   | Brooklyn, NY       | 40.65 | -73.95 | 2004-2010            | Clifford W. Bassett, MD & Mehdi Vesaghi, MD<br>Long Island College Hospital<br>Brooklyn, NY  |
| 6   | Chelmsford, MA     | 42.60 | -71.37 | 2003-2005            | Julian Melamed, M.D.<br>Chelmsford, MA                                                       |
| 7   | Cherry Hill, NJ    | 39.90 | -75.00 | 2003-2010            | Larchmont Medical Center II<br>Donald J. Dvorin, MD FAAAAI<br>Cherry Hill, NJ                |
| 8   | Chicago, IL        | 41.84 | -87.68 | 2003-2010            | John Shane, PhD<br>McCrone Research Institute<br>Chicago, IL                                 |
| 9   | Dayton, OH         | 39.78 | -84.20 | 2003-2010            | Mr. Andy Roth<br>RAPCA<br>Dayton, OH                                                         |
| 10* | Erie, Pennsylvania | 42.13 | -80.09 | 2003-2007, 2009-2010 | Philip E. Gallagher, MD FAAAAI<br>Allergy & Asthma Associates of Northeastern PA<br>Erie, PA |

|    |                   |        |        |                      |                                                                                          |
|----|-------------------|--------|--------|----------------------|------------------------------------------------------------------------------------------|
| 11 | Hamilton, Ontario | 43.25  | -79.1  | 2003-2005            | Jason A. Ohayan, MD<br>Hamilton, ON                                                      |
| 12 | Indianapolis, IN  | 39.78  | -86.15 | 2003-2009            | L.Y. Frank Wu, M.D.<br>St. Vincent Professor Building<br>Indianapolis, IN                |
| 13 | Kansas City, MO   | 39.12  | -94.55 | 2003-2007, 2009-2010 | Jay Portnoy, MD FAAAAI<br>Children's Mercy Hospital<br>Kansas City, MO                   |
| 14 | La Crosse, WI     | 43.83  | -91.23 | 2003-2010            | N/A                                                                                      |
| 15 | Lexington, KY     | 38.043 | -84.46 | 2003-2006, 2008-2010 | Beth Miller, M.D.<br>University of Kentucky Asthma Allergy & Immunology<br>Lexington, KY |
| 16 | Lincoln, NE       | 40.82  | -96.69 | 2004-2009            | Fred Keichel, MD<br>Allergy, Asthma & Immunology Associates<br>Lincoln, NE               |

|    |                  |       |        |           |                                                                               |
|----|------------------|-------|--------|-----------|-------------------------------------------------------------------------------|
| 17 | London, ON       | 42.98 | -81.25 | 2003-2005 | James Anderson, MLT<br>OSHTECH<br>London, ON                                  |
| 18 | Louisville, KY   | 38.22 | -85.74 | 2003-2010 | James L. Sublett, MD FAAAAI<br>Family Allergy & Asthma<br>Louisville, KY      |
| 19 | Madison, WI      | 43.08 | -89.39 | 2003-2010 | Robert Bush, MD FAAAAI<br>UW Medical School<br>Madison, WI                    |
| 20 | Melrose Park, IL | 41.90 | -87.86 | 2003-2010 | Joseph G. Leija, MD FAAAAI<br>Dr. Joseph Leija<br>Melrose Park, IL            |
| 21 | Minneapolis, MN  | 44.96 | -93.27 | 2010      | Harold B. Kaiser, MD FAAAAI<br>Clinical Research Institute<br>Minneapolis, MN |
| 22 | Newark, NJ       | 40.72 | -74.17 | 2003-2009 | Alan Wolff, M.D.<br>UMDNJ<br>Newark, NJ                                       |

|     |                    |       |        |                 |                                                                                         |
|-----|--------------------|-------|--------|-----------------|-----------------------------------------------------------------------------------------|
| 23* | New Castle, DE     | 39.62 | -75.56 | 2005-2010       | Michael McDowell<br>Division of Air Quality, DNREC, State of Delaware<br>New Castle, DE |
| 24  | New York, NY       | 40.08 | -78.43 | 2003-2010       | Guy Robinson, PhD<br>Fordham College at Lincoln Center<br>New York, NY                  |
| 25  | Niagara Falls, ON  | 43.09 | -79.09 | 2003-2005       | Dr. Michael Alexander, MD<br>Niagara Falls, ON                                          |
| 26  | Olean, NY          | 42.08 | -78.43 | 2003-2010       | Fred Lewis, MD FAAAAI<br>Olean, NY                                                      |
| 27  | Philadelphia, PA   | 40.01 | -75.13 | 2003-2007, 2010 | Donald J. Dvorin, MD FAAAAI<br>Allergic Disease Associates, P.C.<br>Philadelphia, PA    |
| 28  | Pittsburgh, PA (2) | 40.44 | -79.98 | 2003-2010       | David Skoner, MD FAAAAI<br>Allegheny General Hospital<br>Pittsburgh, PA                 |

|    |                       |       |        |                      |                                                                                           |
|----|-----------------------|-------|--------|----------------------|-------------------------------------------------------------------------------------------|
| 29 | Rochester, NY         | 43.17 | -77.62 | 2003-2010            | Donald W. Pulver, MD FAAAAI<br>Allergy, Asthma & Immunology of Rochester<br>Rochester, NY |
| 30 | Salem, MA             | 42.53 | -70.87 | 2007-2010            | Paul Hannaway, M.D.<br>Salem, MA                                                          |
| 31 | St. Claire Shores, MI | 42.49 | -82.89 | 2003-2005, 2009-2010 | Andrew I. Dzul, MD<br>Lakeshore Ear Nose & Throat Center<br>St. Clair Shores, MI          |
| 32 | St. Louis, MO         | 38.64 | -90.24 | 2003,2006-2010       | Mr. Wayne Wilhelm<br>St. Louis County Health Department<br>Berkeley, MO (St. Louis)       |
| 33 | Washington, DC        | 38.91 | -77.02 | 2003-2010            | Susan E. Kosisky MA<br>Walter Reed Army Medical Ctr.<br>Washington, DC                    |
| 34 | Waterbury, CT         | 41.56 | -73.04 | 2003-2010            | Christopher Randolph, MD FAAAAI<br>Waterbury, CT                                          |

|    |               |       |        |           |                                                                                    |
|----|---------------|-------|--------|-----------|------------------------------------------------------------------------------------|
| 35 | Waukesha, WI  | 43.01 | -88.24 | 2007-2009 | Walter Brummund, MD, PhD, FAAAAI<br>Allergy & Asthma Centers, S.C.<br>Waukesha, WI |
| 36 | Wauwatosa, WI | 43.06 | -88.03 | 2003-2006 | Walter Brummund, MD, PhD, FAAAAI<br>Allergy & Asthma Centers, S.C.<br>Waukesha, WI |
| 37 | York, PA      | 39.96 | -76.73 | 2003-2010 | Michael S. Nickels, MD PhD<br>Allergy and Asthma Consultants, Inc.<br>York, PA     |

**Southeast (33)**

|   |             |       |        |           |                                                                                                                                      |
|---|-------------|-------|--------|-----------|--------------------------------------------------------------------------------------------------------------------------------------|
| 1 | Atlanta, GA | 33.76 | -84.42 | 2003-2010 | Santley M. Fineman, MD MBA FAAAAI<br>Atlanta Allergy and Asthma<br>Marietta, GA (Atlanta)                                            |
| 2 | Austin, TX  | 30.31 | -97.95 | 2003-2005 | Kim T. Hovanky, MD FAAAAI &<br>Sheila M. Amar, MD FAAAAI, FAAAAI<br>Allergy & Asthma Center of Georgetown<br>Austin, TX (Georgetown) |

|   |                        |       |        |           |                                                                                                             |
|---|------------------------|-------|--------|-----------|-------------------------------------------------------------------------------------------------------------|
| 3 | Baton Rouge, Louisiana | 30.45 | -91.13 | 2003-2005 | James M. Kidd III<br>Kidd Allergy Clinic<br>Baton Rouge, LA                                                 |
| 4 | Birmingham, AL         | 33.53 | -86.80 | 2010      | Weilly Soong, MD FAAAAI<br>Birmingham-Southern College/Alabama Allergy &<br>Asthma Center<br>Birmingham, AL |
| 5 | Charlotte, NC          | 35.20 | -80.83 | 2003-2007 | John T. Klimas, MD FAAAAI<br>Carolina Asthma and Allergy Center<br>Charlotte, NC                            |
| 6 | College Station, TX    | 30.60 | -96.31 | 2003-2010 | David R. Weldon, MD FAAAAI, FAAAAI<br>Scott & White Clinic<br>College Station, TX                           |
| 7 | Corpus Christi, TX     | 27.69 | -97.29 | 2003-2005 | Gary L. Smith, M.D.<br>Corpus Christi, TX                                                                   |
| 8 | Dallas, TX             | 32.79 | -96.77 | 2003-2010 | Jeffrey Adelglass, M.D.<br>Dr. Jeffrey Adelglass<br>Dallas, TX                                              |



|    |                  |       |        |           |                                                                                                                                      |
|----|------------------|-------|--------|-----------|--------------------------------------------------------------------------------------------------------------------------------------|
| 9  | Fargo, ND        | 46.88 | -96.82 | 2003-2010 | Dan Dalan, MD FAAAAI<br>Allergy & Asthma Care Center<br>Fargo, ND                                                                    |
| 10 | Flower Mound, TX | 33.03 | -97.09 | 2006-2010 | Marie H Fitzgerald, MD<br>North Texas Pollen Station<br>Flower Mound, TX                                                             |
| 11 | Fort Smith, AK   | 35.37 | -94.38 | 2003-2006 | N/A                                                                                                                                  |
| 12 | Georgetown, TX   | 30.65 | -97.69 | 2006-2010 | Kim T. Hovanky, MD FAAAAI &<br>Sheila M. Amar, MD FAAAAI, FACAAI<br>Allergy & Asthma Center of Georgetown<br>Austin, TX (Georgetown) |
| 13 | Greenville, SC   | 34.84 | -82.37 | 2003-2010 | Neil L Kao MD FAAAAI<br>Allergic Disease and Asthma Center<br>Greenville, SC                                                         |
| 14 | Houston, TX      | 29.77 | -95.39 | 2005-2010 | Mr. Tony Huynh<br>City of Houston<br>Houston, TX                                                                                     |

|    |                 |       |        |           |                                                                                    |
|----|-----------------|-------|--------|-----------|------------------------------------------------------------------------------------|
| 15 | Huntsville, AL  | 34.71 | -86.63 | 2003-2010 | Ms. Debra Hopson<br>Natural Resources & Environmental Management<br>Huntsville, AL |
| 16 | Knoxville, TN   | 35.97 | -83.95 | 2003-2010 | Michael Miller, MD FAAAAI<br>Allergy, Asthma and Immunology<br>Knoxville, TN       |
| 17 | Little Rock, AK | 34.72 | -92.35 | 2004-2010 | Karl V Sitz, MD<br>Little Rock Allergy & Asthma Clinic<br>Little Rock, AR          |
| 18 | Miami, FL       | 25.78 | -80.21 | 2003-2005 | Elene Ubals, MD &<br>Richard Schiff, MD, PhD<br>Miami, FL                          |
| 19 | New Orleans, LA | 30.07 | -89.93 | 2008-1010 | W Edward Davis MD MS MBA MMM<br>Ochsner Clinic Foundation<br>New Orleans, LA       |
| 20 | Ocala, FL       | 29.19 | -82.13 | 2003-2005 | Dr. Karl M Altenburger<br>Allergy and Asthma Care of Florida<br>Ocala, FL          |

|     |                       |       |        |           |                                                                                            |
|-----|-----------------------|-------|--------|-----------|--------------------------------------------------------------------------------------------|
| 21  | Oklahoma City, OK (2) | 35.47 | -97.51 | 2003-2010 | Warren V. Filley, MD FAAAAI<br>OK Allergy Asthma Clinic, Inc.<br>Oklahoma City, OK         |
| 22  | Omaha, NE             | 41.26 | -96.01 | 2003-2010 | N/A                                                                                        |
| 23  | Orlando, FL           | 28.51 | -81.37 | 2006-2007 | Bruce A. Hornberger, MD FAAAAI<br>Allergy & Asthma Center of East Orlando<br>Orlando, FL   |
| 24  | Oxford, AL            | 33.61 | -85.84 | 2010      | Robert Grubbe, MD<br>Allergy & Asthma Center, LLC<br>Oxford, AL                            |
| 25  | Rogers, AK            | 36.33 | -94.13 | 2006-2010 | Curtis L. Hedberg, MD FAAAAI<br>Hedberg Allergy & Asthma Center<br>Rogers, AR (Fort Smith) |
| 26* | Sarasota, FL          | 27.34 | -82.53 | 2003-2010 | Mary Jelks, MD FAAAAI<br>Sarasota, FL                                                      |

|    |                 |       |        |           |                                                                                                    |
|----|-----------------|-------|--------|-----------|----------------------------------------------------------------------------------------------------|
| 27 | Savannah, GA    | 32.02 | -81.13 | 2008-2010 | Brad H. Goodman, M.D. &<br>Bruce D. Finkel, M.D.<br>Coastal Allergy & Asthma, P.C.<br>Savannah, GA |
| 28 | Tallahassee, FL | 30.46 | -84.28 | 2003-2005 | Ronald Saff, M.D.<br>Tallahassee, FL                                                               |
| 29 | Tampa, FL       | 27.96 | -82.48 | 2003-2010 | Richard Lockey, MD FAAAAI<br>University of South Florida<br>Tampa, FL                              |
| 30 | Tulsa, OK       | 36.13 | -95.92 | 2003-2010 | Estelle Levetin, PhD FAAAAI<br>University of Tulsa<br>Tulsa, OK                                    |
| 31 | Waco, TX (2)    | 31.57 | -97.18 | 2003-2010 | N.J. Amar, MD FAAAAI<br>Allergy and Asthma Center<br>Waco, TX                                      |

**Mountain (8)**

|    |                      |       |         |                      |                                                                                        |
|----|----------------------|-------|---------|----------------------|----------------------------------------------------------------------------------------|
| 1  | Bismarck, ND         | 46.81 | -100.77 | 2003-2005, 2010      | Dan Dalan, M.D.<br>North Dakota DOH East Lab<br>Bismarck, ND                           |
| 2  | Colorado Springs (2) | 38.86 | -104.76 | 2003-2010            | William Storms, MD FAAAAI<br>The William Storms Allergy Clinic<br>Colorado Springs, CO |
| 3  | Draper, UT           | 40.52 | -111.86 | 2009-2010            | Duane J. Harris, MD FAAAAI<br>Intermountain Allergy & Asthma Clinic<br>Draper, UT      |
| 4* | Missoula, MT         | 46.87 | -114.01 | 2006-2007, 2009-2010 | Emily Weiler<br>U of Montana, Ctr for Environmental Health Sciences<br>Missoula, MT    |
| 5  | Salt Lake City, UT   | 40.78 | -111.93 | 2003-2004, 2008      | N/A                                                                                    |
| 6  | Scottsdale, AZ       | 33.69 | -111.87 | 2006-2007            | Michael E. Manning, M.D.<br>Scottsdale, AZ                                             |

|    |                |       |         |           |     |
|----|----------------|-------|---------|-----------|-----|
| 7* | Twin Falls, ID | 42.56 | -114.46 | 2003-2010 | N/A |
|----|----------------|-------|---------|-----------|-----|

**California (13)**

|   |                |       |         |                 |                                                                                                                  |
|---|----------------|-------|---------|-----------------|------------------------------------------------------------------------------------------------------------------|
| 1 | La Jolla, CA   | 32.84 | -117.26 | 2003-2010       | Robert Reid, Jr, MD<br>Scripps Memorial Hospital<br>LaJolla, CA                                                  |
| 2 | Orange, CA     | 33.81 | -117.82 | 2003-2010       | Sherwin A. Gillman, M.D.<br>Children's Hospital of Orange County-Pediatric<br>Subspecialty Faculty<br>Orange, CA |
| 3 | Pasadena, CA   | 34.16 | -118.14 | 2004-2005, 2010 | Philip Taylor, PhD<br>The Pollen Group<br>Pasadena, CA                                                           |
| 4 | Pleasanton, CA | 37.67 | -121.89 | 2003-2010       | N/A                                                                                                              |

|    |                  |       |         |                      |                                                                                                     |
|----|------------------|-------|---------|----------------------|-----------------------------------------------------------------------------------------------------|
| 5  | Reno, NV         | 39.54 | -119.82 | 2003-2006, 2009-2010 | Leonard Shapiro, MD FAAAAI<br>Allergy & Asthma Associates<br>Sparks, NV                             |
| 6  | Roseville, CA    | 38.76 | -121.29 | 2006-2010            | Sunil P. Perera, MD FAAAAI<br>Allergy Medical Group of the North Area<br>Roseville, CA (Sacramento) |
| 7  | Sacramento, CA   | 38.57 | -121.47 | 2003-2006            | Sunil P. Perera, MD FAAAAI<br>Allergy Medical Group of the North Area<br>Roseville, CA (Sacramento) |
| 8  | Salinas, CA      | 36.68 | -121.64 | 2003                 | Steven S. Prager, M.D.<br>Salinas Allergy Clinic<br>Salinas, CA                                     |
| 9  | San Diego, CA    | 32.82 | -117.14 | 2006, 2008-2010      | Robert T. Reid, MD<br>Erik and Ese Banck Clinical Research Center<br>San Diego, CA                  |
| 10 | San Jose, CA (2) | 37.30 | -121.85 | 2003-2010            | Theodore Chu, MD FAAAAI<br>San Jose, CA                                                             |

|    |                   |       |         |           |                                                                                                                              |
|----|-------------------|-------|---------|-----------|------------------------------------------------------------------------------------------------------------------------------|
| 11 | Santa Barbara, CA | 34.43 | -119.72 | 2003-2010 | Myron Liebhaber, M.D.<br>Sansum - Santa Barbara Medical Foundation Clinic<br>Santa Barbara, CA                               |
| 12 | Stockton, CA      | 37.97 | -121.31 | 2009-2010 | Gregory W. Bensch, MD FAAAAI & George W<br>Bensch, MD FAAAAI<br>Allergy, Immunology and Asthma Medical Group<br>Stockton, CA |

**Pacific NW (4)**

|    |                   |       |         |           |                                                                                |
|----|-------------------|-------|---------|-----------|--------------------------------------------------------------------------------|
| 1  | Crescent City, CA | 41.76 | -124.20 | 2009-2010 | N/A                                                                            |
| 2* | Eugene, OR        | 44.05 | -123.11 | 2003-2010 | Kraig W. Jacobson, MD, FAAAAI<br>Allergy & Asthma Research Group<br>Eugene, OR |
| 3  | Seattle, WA       | 47.62 | -122.35 | 2003-2010 | N/A                                                                            |



|    |               |       |         |           |                                                               |
|----|---------------|-------|---------|-----------|---------------------------------------------------------------|
| 4* | Vancouver, WA | 45.63 | -122.64 | 2003-2010 | Raymond Brady, M.D. and Joseph Hassett, M.D.<br>Vancouver, WA |
|----|---------------|-------|---------|-----------|---------------------------------------------------------------|

1059 **Table S1.** AAAAI pollen counting stations included in development and evaluation of model. Categorized by U.S. subregions Northeast, Southeast, Mountain,  
1060 California, and Pacific Northwest. Sites equipped with two samplers are denoted in parentheses (ex. Pittsburgh, PA (2)). Station numbers with asterisk (\*) are  
1061 collocated with DayMet temperature for phenological regressions.

| <b>Taxon</b>                        | <b>Maximum P<sub>avgmax</sub><br/>(grains m<sup>-3</sup>)</b> | <b>Average P<sub>avgmax</sub><br/>(grains m<sup>-3</sup>)</b> |
|-------------------------------------|---------------------------------------------------------------|---------------------------------------------------------------|
| <i>Acer</i>                         | 535                                                           | 212                                                           |
| <i>Alnus</i>                        | 176                                                           | 73                                                            |
| <i>Ambrosia</i>                     | 379                                                           | 193                                                           |
| <b>Arecaceae</b>                    | 27                                                            | 13                                                            |
| <i>Artemisia</i>                    | 76                                                            | 36                                                            |
| <b>Asteraceae</b>                   | 64                                                            | 28                                                            |
| <i>Betula</i>                       | 564                                                           | 232                                                           |
| <i>Carpinus/Ostrya</i>              | 71                                                            | 29                                                            |
| <i>Carya</i>                        | 126                                                           | 54                                                            |
| <i>Celtis</i>                       | 155                                                           | 65                                                            |
| <b>Chenopodiaceae/Amaranthaceae</b> | 80                                                            | 29                                                            |
| <i>Corylus</i>                      | 13                                                            | 5                                                             |
| <b>Cupressaceae</b>                 | 1949                                                          | 960                                                           |
| <b>Cyperaceae</b>                   | 37                                                            | 12                                                            |
| <i>Eupatorium</i>                   | 27                                                            | 13                                                            |
| <i>Fagus</i>                        | 66                                                            | 17                                                            |
| <i>Fraxinus</i>                     | 462                                                           | 227                                                           |
| <b>Graminae / Poaceae</b>           | 197                                                           | 98                                                            |
| <i>Juglans</i>                      | 71                                                            | 34                                                            |
| <i>Ligustrum</i>                    | 13                                                            | 6                                                             |
| <i>Liquidambar</i>                  | 109                                                           | 44                                                            |
| <i>Morus</i>                        | 940                                                           | 398                                                           |
| <i>Myrica</i>                       | 50                                                            | 25                                                            |
| <i>Olea</i>                         | 197                                                           | 43                                                            |
| <b>Other Grass Pollen</b>           | 85                                                            | 42                                                            |
| <b>Other Tree Pollen</b>            | 863                                                           | 332                                                           |
| <b>Other Weed Pollen</b>            | 160                                                           | 51                                                            |
| <b>Pinaceae</b>                     | 645                                                           | 328                                                           |
| <i>Plantago</i>                     | 33                                                            | 13                                                            |
| <i>Platanus</i>                     | 191                                                           | 103                                                           |
| <i>Populus</i>                      | 367                                                           | 158                                                           |
| <i>Prosopis</i>                     | 34                                                            | 16                                                            |
| <i>Pseudotsuga</i>                  | 7                                                             | 3                                                             |

|                     |      |      |
|---------------------|------|------|
| <i>Quercus</i>      | 2106 | 1081 |
| <i>Rumex</i>        | 59   | 23   |
| <i>Salix</i>        | 123  | 58   |
| <i>Tilia</i>        | 19   | 6    |
| <i>Tsuga</i>        | 12   | 5    |
| <i>Typha</i>        | 19   | 10   |
| <i>Ulmus</i>        | 556  | 249  |
| Unidentified Pollen | 198  | 57   |
| Urticaceae          | 86   | 36   |

1063 **Table S2. Maximum and average  $P_{avgmax}$**  used for selecting pollen taxa for this study. Shaded taxa are selected taxa  
1064 based on minimum of 1) 100 grains  $m^{-3}$  for the maximum  $P_{avgmax}$  and 2) 70 grains  $m^{-3}$  for the **average  $P_{avgmax}$** .  
1065  
1066

Matthew Wozniak 8/9/2017 11:27 AM  
Deleted: SI
